# Supplementary material for: An integrated stress response via PKR suppresses HER2+ cancers and improves trastuzumab therapy
Source: PubMed Central journal article supplement (PMC6513990; doi:10.1038/s41467-019-10138-8), 2019-05-13
Supplement: 41467_2019_10138_MOESM1_ESM.pdf [file 41467_2019_10138_MOESM1_ESM.pdf]

**An Integrated Stress Response via PKR Suppresses HER2+  
cancers and Improves Trastuzumab Therapy.**

Darini C, Ghaddar N, Chabot C, Assaker G, Sabri S, Wang S, Krishnamoorthy J, Buchanan M, Aguilar-Mahecha A, Abdulkarim B, Deschenes J, Torres J, Ursini-Siegel J, Mark Basik M, Koromilas AE

**SUPPLEMENTARY INFORMATION**

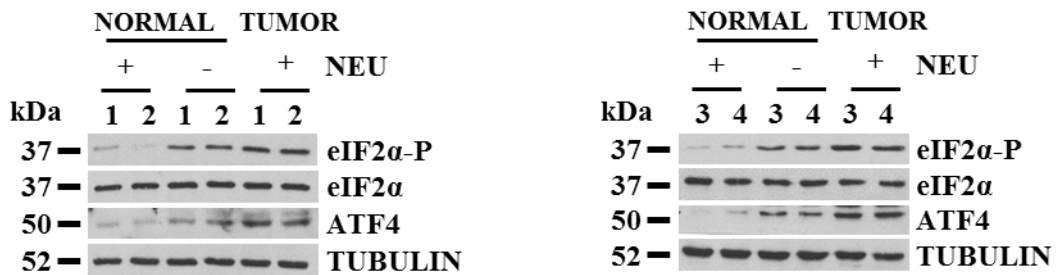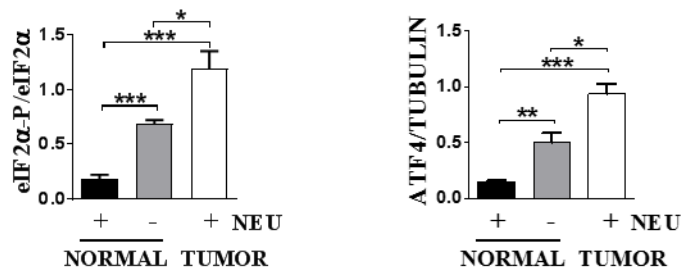

**Supplementary Figure 1. eIF2α-P and ATF4 levels are low in mouse NEU mammary gland prior to tumor formation and high in formed tumors.** Immunoblotting of protein extracts of mammary tissue from FVB/N mice lacking (Normal, -NEU), or expressing NEU prior to (Normal, +NEU) or after tumor formation (Tumor, +NEU). Quantification of data from the analysis of 4 mice of each group. ±SEM \*p<0.05; \*\* p<0.01; \*\*\* p<0.001.

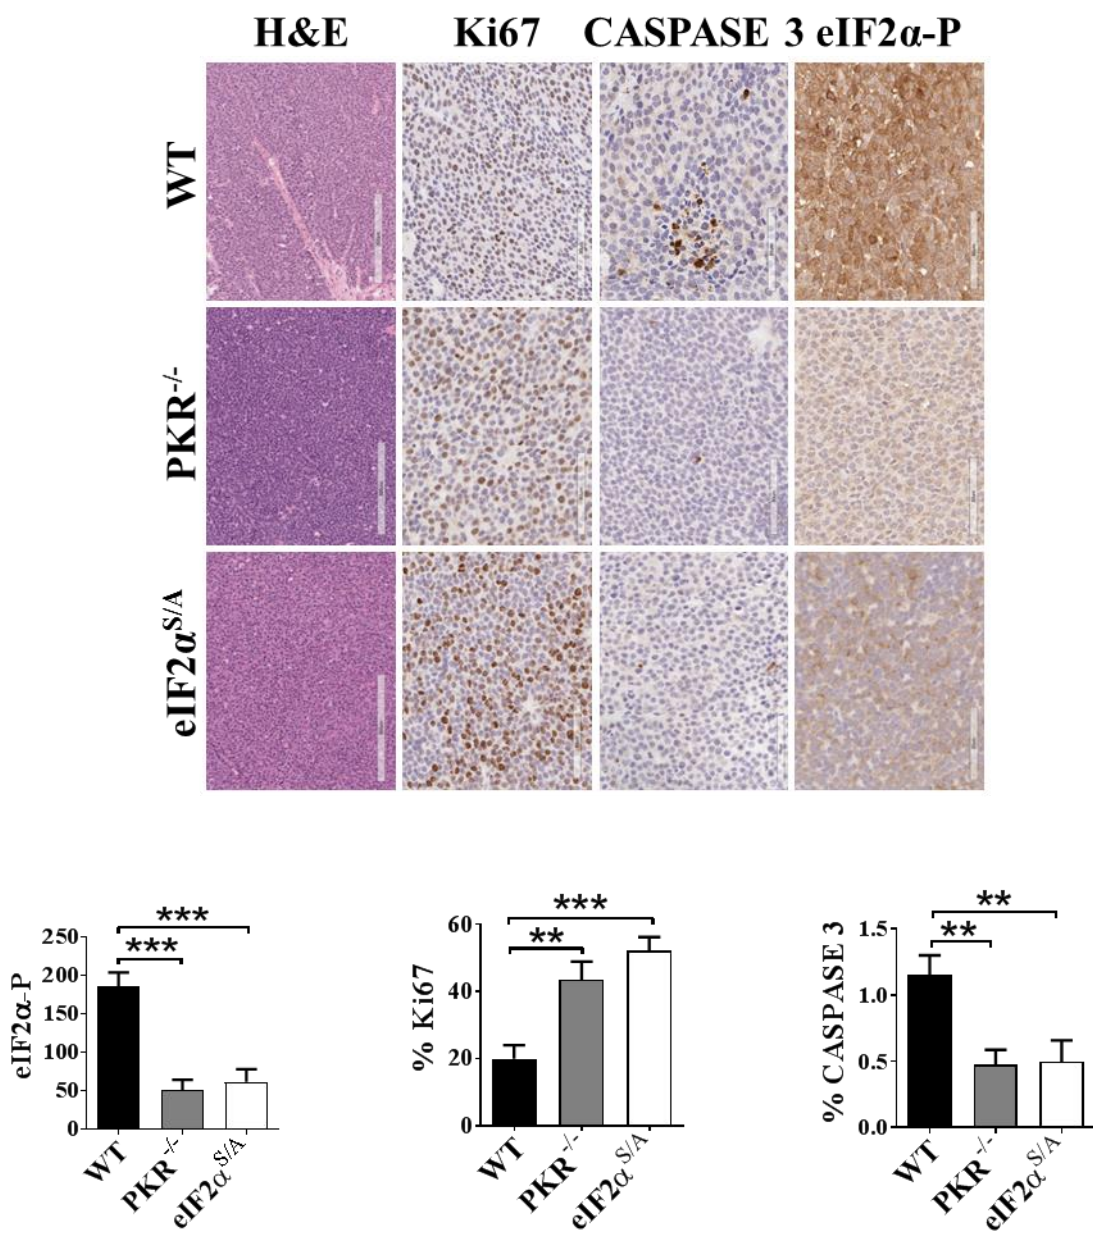

**Supplementary Figure 2. PKR and eIF2 $\alpha$ -P decrease the proliferation and increase apoptosis of mouse NEU breast tumors.** H&E staining and IHC analyses of Ki67, cleaved Caspase 3 and eIF2 $\alpha$ -P in sections from NEU WT, NEU PKR<sup>-/-</sup> or NEU eIF2 $\alpha$ <sup>S/A</sup> tumors isolated 4 weeks after initial detection by palpation (Fig. 1a). The H-score of eIF2 $\alpha$ -P and the % of positive cells for Ki67 and Cleaved Caspase 3 were quantified by the Aperio ImageScope software from the analysis of tumors from 8 different mice per group. Data represent mean  $\pm$ SEM \*\* p<0.01; \*\*\* p<0.001.

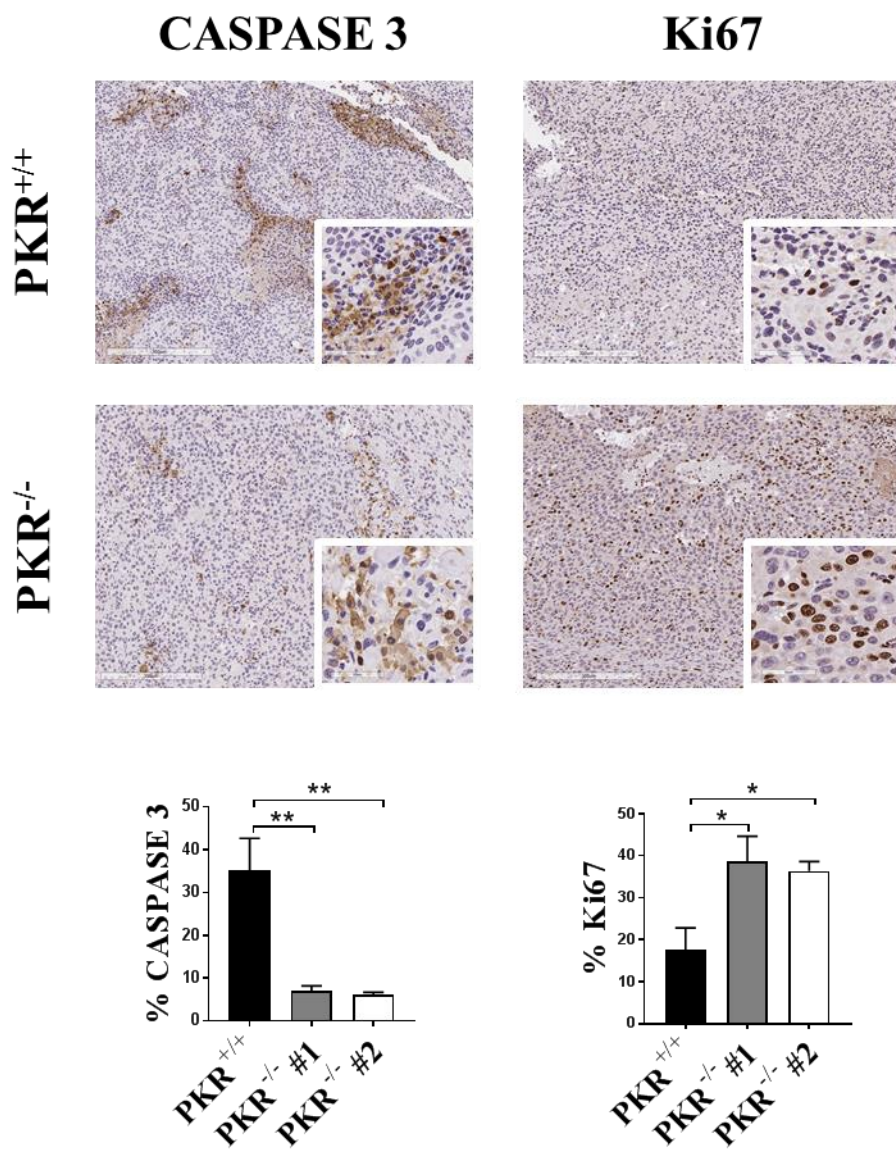

**Supplementary Figure 3. PKR inhibits proliferation and increases apoptosis of mouse NEU breast tumors in SCID mice.** IHC analyses of Ki67 and cleaved Caspase 3 in sections from NEU WT and NEU PKR<sup>-/-</sup> tumors isolated from SCID mice (Fig. 2a). The % of positive cells for Ki67 and Cleaved Caspase 3 were quantified by the Aperio ImageScope software from the analysis of tumors from 3 different mice per group. Data represent mean  $\pm$ SEM \*p < 0.05; \*\* p<0.01.

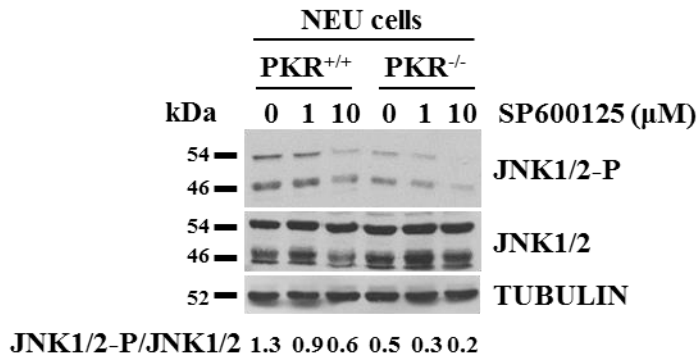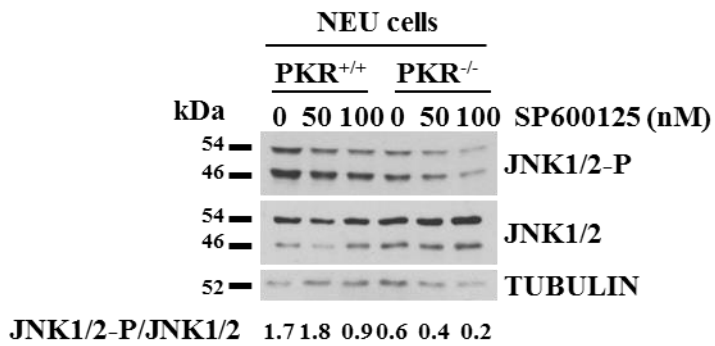

**Supplementary Figure 4. Inhibition of JNK1/2-phosphorylation by SP600125.** Mouse NEU PKR<sup>+/+</sup> and PKR<sup>-/-</sup> tumor cells were treated with indicated concentration of SP600125 and immunoblotted for phosphorylated and total JNK1/2 levels. Quantifications of the phosphorylated JNK1/2 normalized to total JNK1/2 for each lane are indicated.

**a**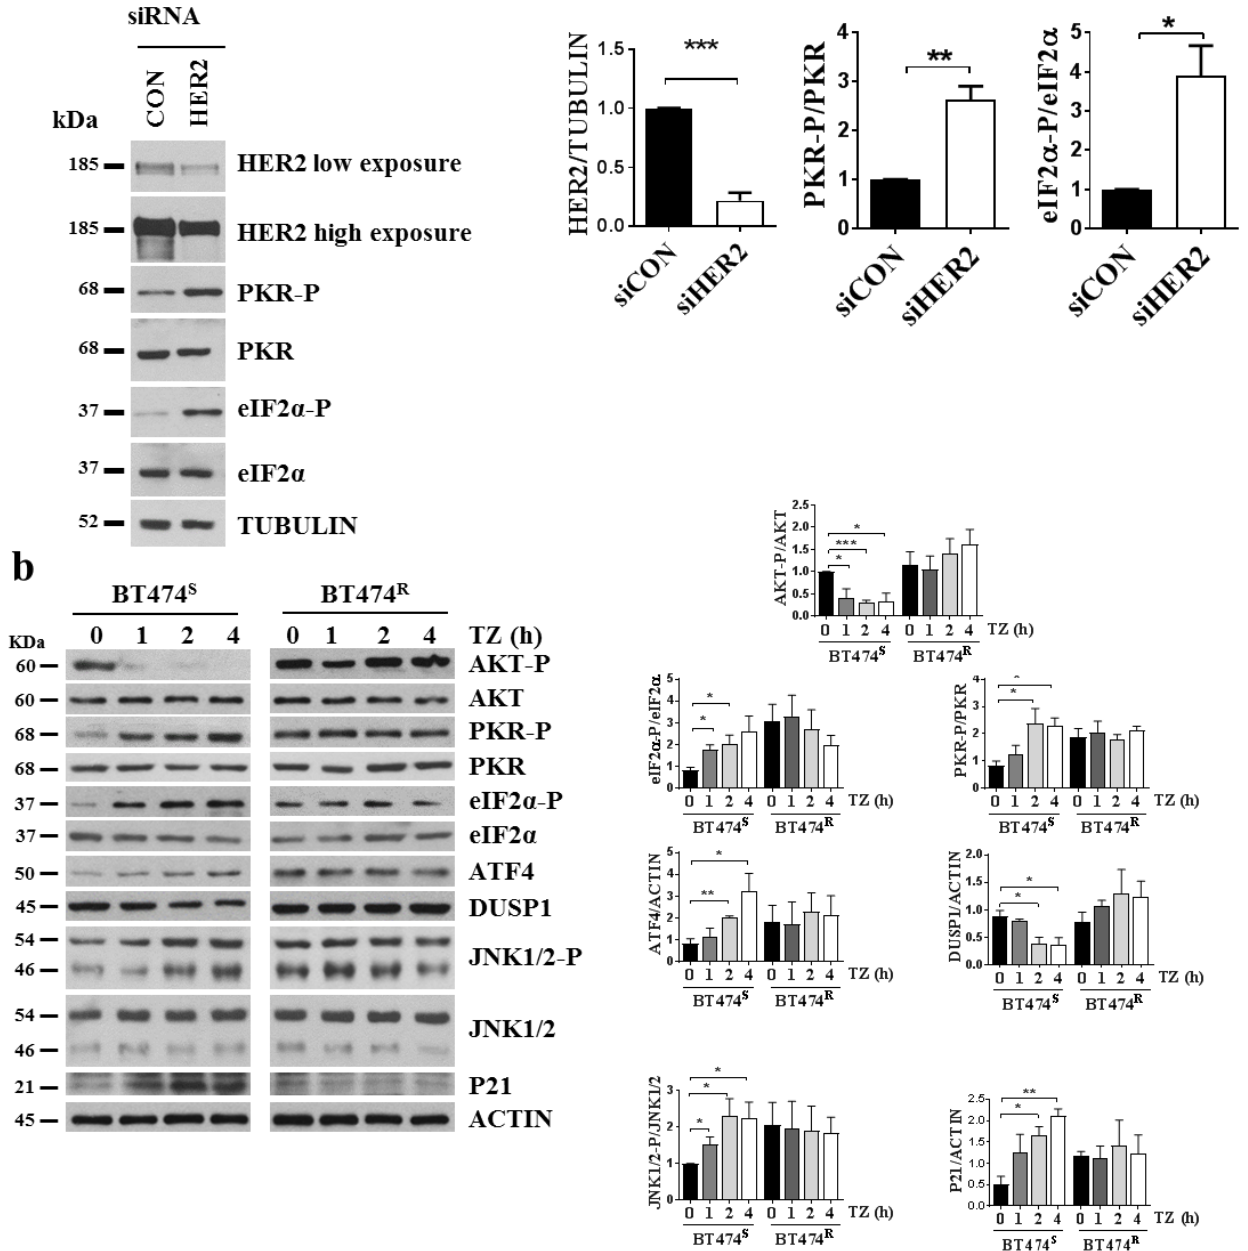

**Supplementary Figure 5. PKR is inhibited by HER2 and activated by Trastuzumab in breast tumor cells.** (a) BT474 cells were treated with scrambled siRNAs (CON) or HER2 siRNAs and subjected to immunoblotting for the indicated proteins. Quantification of blots from 3 biological replicates are indicated. (b) Immunoblot analyses of the indicated proteins in protein extracts from Trastuzumab sensitive (S) or resistant (R) BT474 cells treated with 21 $\mu$ g/ml Trastuzumab for the indicated time. Quantification of data represent from 3 biological replicates. (a, b) Data represent mean  $\pm$ SEM \* $p$  < 0.05; \*\* $p$  < 0.01; \*\*\*  $p$  < 0.001

**a**

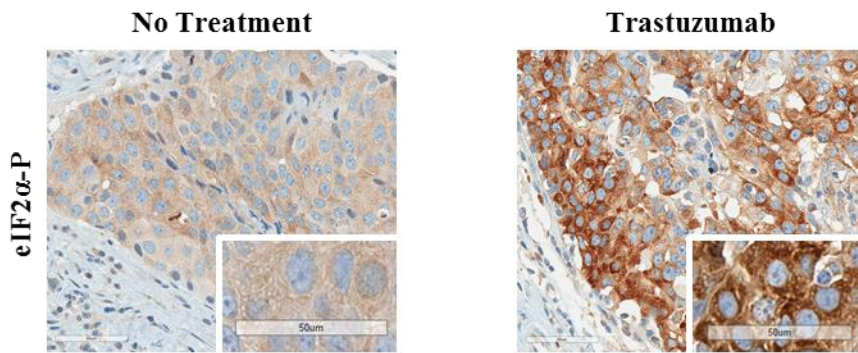

**b**

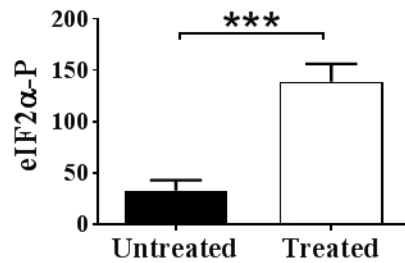

**Supplementary Figure 6. Trastuzumab increases eIF2α-P in tumors from HER2+ breast cancer patients.** (a) Representative IHC staining of eIF2α-P in HER2+ breast tumors before and after Trastuzumab treatment of the same patient, who developed resistance to therapy. (b) The intensity of eIF2α-P was evaluated by the Aperio ImageScope software. The graph shows the histoscore (H-score) of the intensity of eIF2α-P in tumors before and after Trastuzumab therapy of 6 patients of HER2+ breast cancer with resistance to Trastuzumab. Data represent mean ±SEM \*\*\* p<0.001

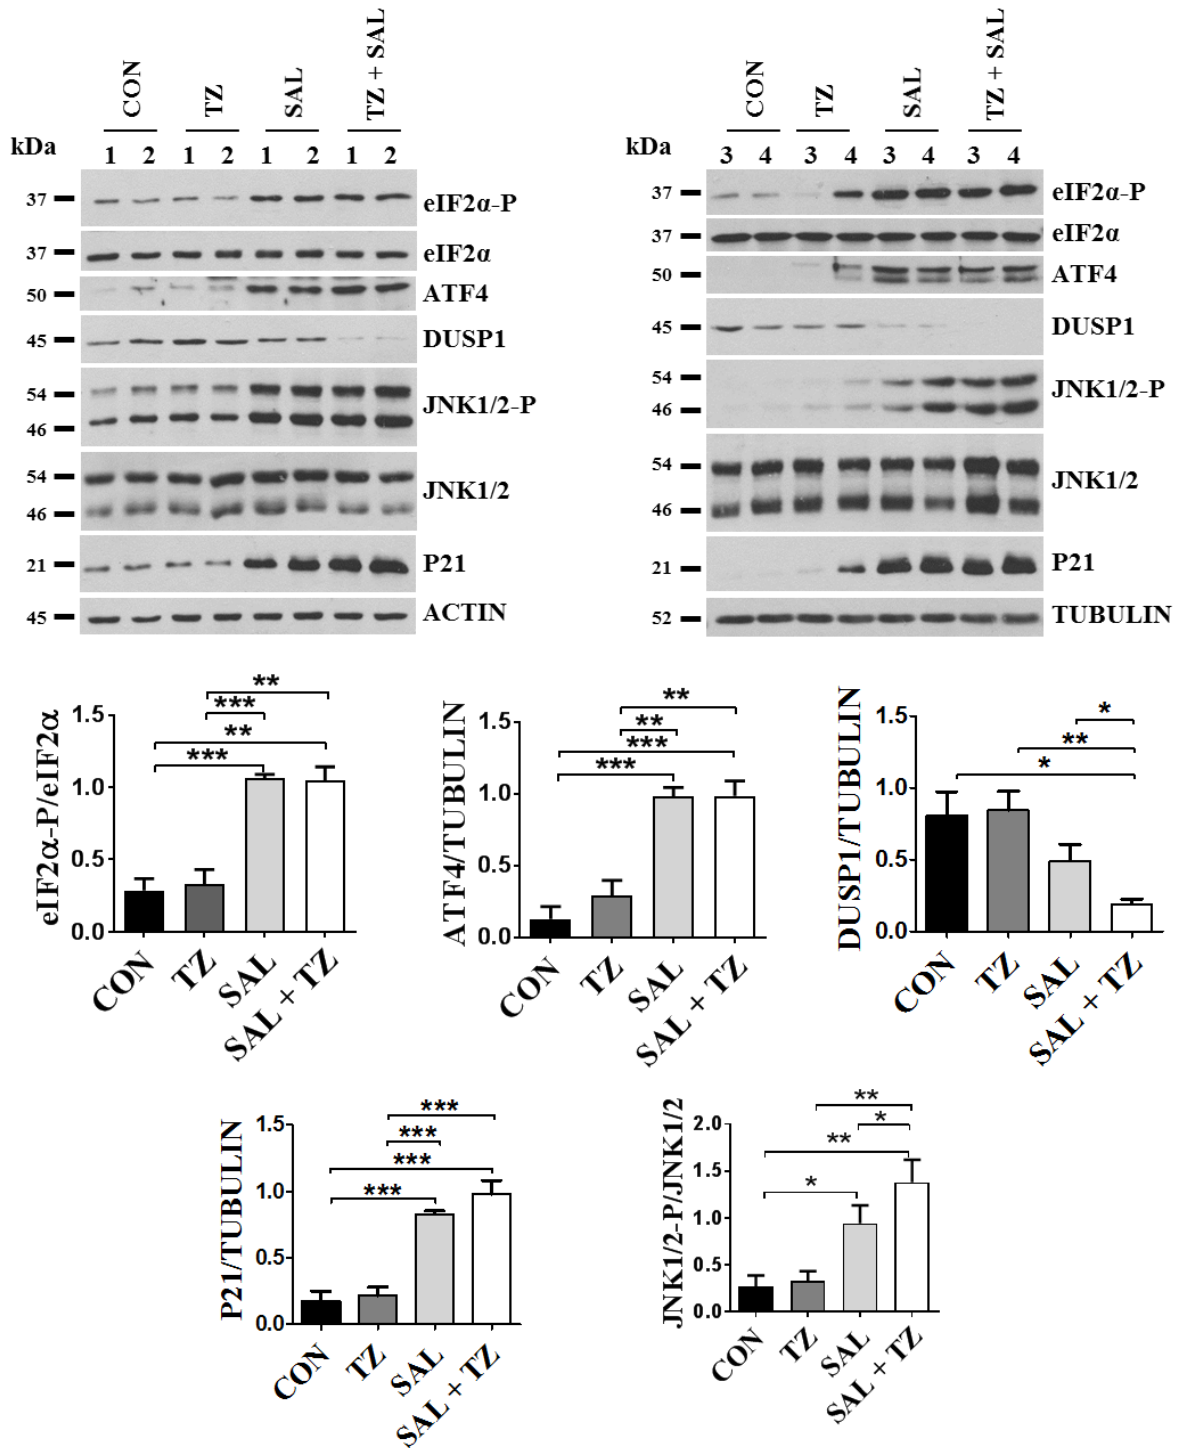

**Supplementary Figure 7. SAL003 induces the anti-tumor pathways downstream of eIF2α-P in HER2+ gastric PDXs co-treated with Trastuzumab.** Protein extracts of HER2+ gastric tumors grown in NOG mice treated with SAL003 and/or Trastuzumab in Fig. 6 were subjected to immunoblotting for the indicated proteins. Quantifications were performed with data from the analyses of 4 different tumors per type of treatment. Data represent mean  $\pm$ SEM \* $p$ <0.05; \*\* $p$ <0.01; \*\*\*  $p$ <0.001.



## IHC of eIF2 $\alpha$ -P

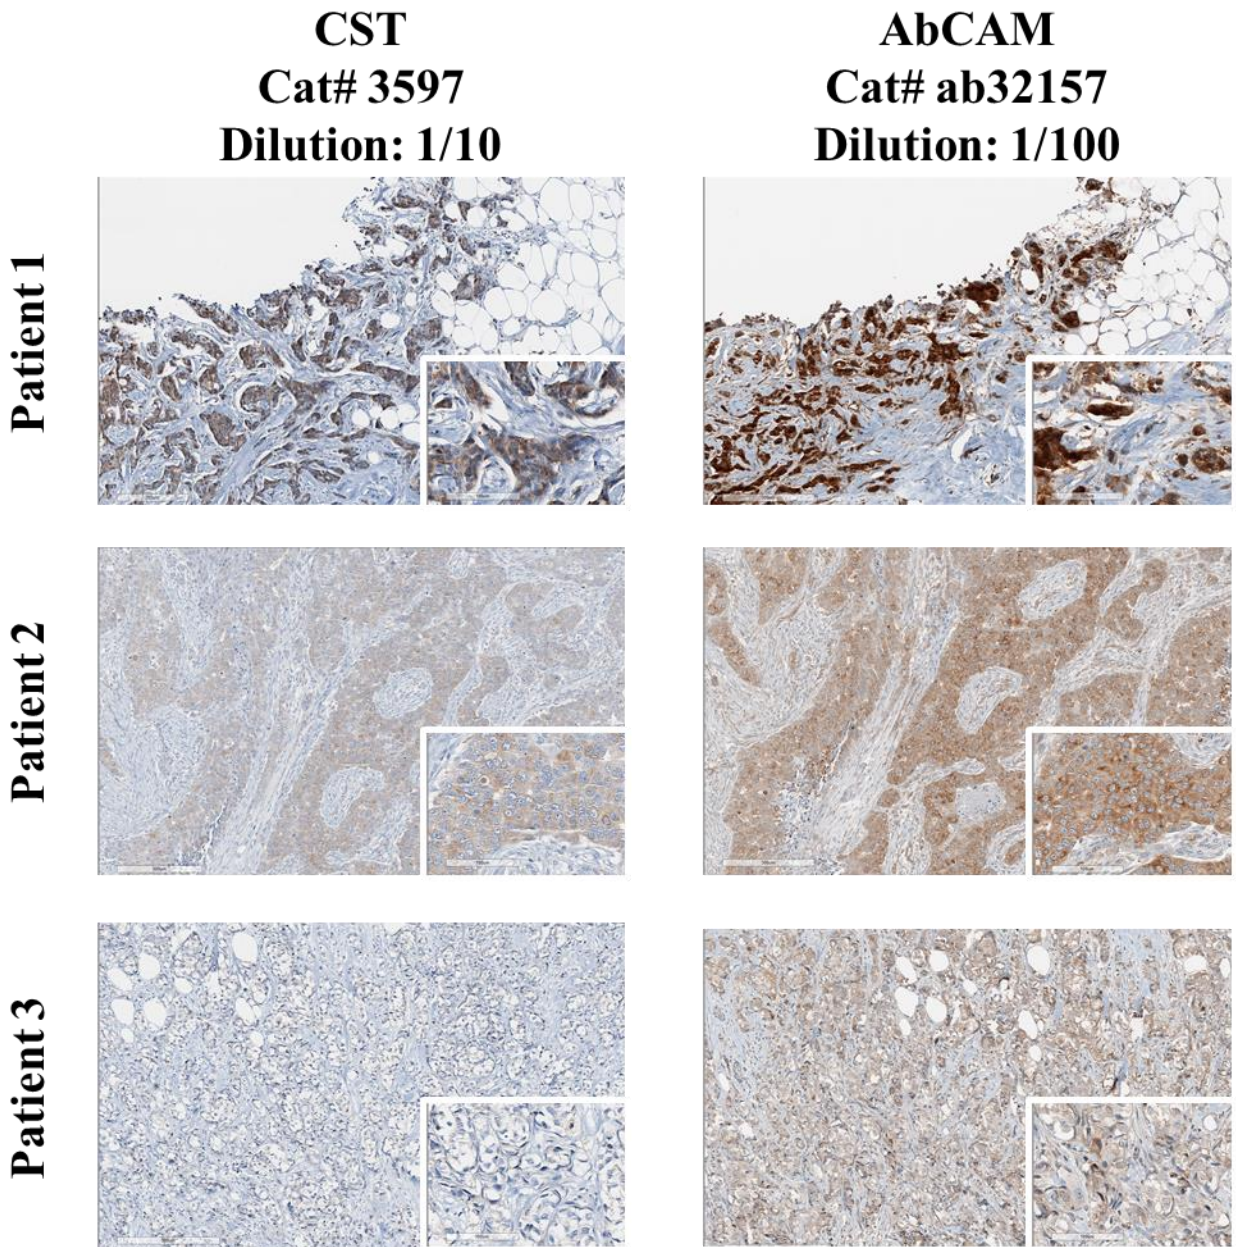

**Supplementary Figure 8. Quality control analysis of the anti-eIF2 $\alpha$ -P antibody.** IHC analyses of identical tumor sections from 3 Trastuzumab-resistant HER2+ breast cancer patients, which were included in Supplementary Fig. 6, with an anti-eIF2 $\alpha$ -P antibody from Cell Signaling Technology (CST Cat# 3597) or Abcam (Cat# ab32157) used in this study.

| Application | Target gene | Sequence                                                             |
|-------------|-------------|----------------------------------------------------------------------|
| gRNA        | PKR         | 5'-TAATGGCTACTCCGTGCATC-3'                                           |
| shRNA       | DUSP1       | #1: 5'-CCGGCATGAGGACTAACC GGGTAAACTCGAGTTTACCCGGTTAGTCTCATGTTTTT-3'  |
|             |             | #2: 5'-CCGGGTTGTTGGATTGTCGCTCCTTCTCGAGAAGGAGCGACAATCCAACAAC TTTTT-3' |
|             | ATF4        | #1: 5'-CCGGCCAGAGCATTCTTTAGTTTACTCGAGTAACTAAAGGAATGCTCTGGTTTTTG-3'   |
|             |             | #2: 5'-CCGGCGGACAAAGATACCTTCGAGTCTCGAGACTCGAAGGTATCTTTGTCCGTTTTTG-3' |
| RT-PCR      | DUSP1       | Fw 5'-GTTGTTGGATTGTCGCTCCTTC-3'                                      |
|             |             | Rv 5'-TTGGGCACGATATGCTCCAG-3'                                        |
|             | P21         | Fw 5'-GCAGATCCACAGCGATATCC-3'                                        |
|             |             | Rv 5'-CAACTGCTCACTGTCCACGG-3'                                        |
|             | ACTIN       | Fw 5'-CAGCAGATGTGGATCAGCAAG-3'                                       |
|             |             | Rv 5'-GCATTTGCGGTGGACGAT-3'                                          |
|             | GAPDH       | Fw 5'-GAGAGTGTTTCCTCGTCCCG-3'                                        |
|             |             | Rv 5'-CAATCTCCACTTTGCCACTGC-3'                                       |

**Supplementary Table 1. Sequences of DNA primers used in the study.**

| Antibody                                     | Species           | Company               | Cat #        | Dilution |       |
|----------------------------------------------|-------------------|-----------------------|--------------|----------|-------|
|                                              |                   |                       |              | WB       | IHC   |
| phosphoserine 51-eIF2 $\alpha$               | rabbit monoclonal | Novus Biologicals     | NB 110-56949 | 1/1000   | 1/100 |
| phosphoserine 51-eIF2 $\alpha$               | rabbit monoclonal | Cell Signaling        | 3597         |          | 1/10  |
| phosphoserine 51-eIF2 $\alpha$               | rabbit monoclonal | AbCAM                 | ab32157      |          | 1/100 |
| phosphothreonine 446-PKR                     | rabbit monoclonal | AbCAM                 | ab32036      | 1/1000   |       |
| PKR                                          | mouse monoclonal  | Santa Cruz            | sc-6282      | 1/1000   |       |
| ATF4                                         | rabbit polyclonal | Proteintech           | 10835-1-AP   | 1/1000   |       |
| P21 Waf/Cip1 (12D1)                          | rabbit monoclonal | Cell Signaling        | 2947         | 1/1000   |       |
| Actin                                        | mouse monoclonal  | mpbio                 | C4           | 1/5000   |       |
| phospho-Akt (Ser473)                         | rabbit monoclonal | Cell Signaling        | 4060         | 1/1000   |       |
| Akt                                          | rabbit polyclonal | Cell Signaling        | 9272         | 1/1000   |       |
| DUSP1                                        | rabbit polyclonal | Millipore             | 7535         | 1/1000   |       |
| HER2                                         | rabbit polyclonal | Cell Signaling        | 2165         | 1/1000   |       |
| eIF2 $\alpha$                                | mouse monoclonal  | Cell Signaling        | 2103         | 1/1000   |       |
| JNK1/2-P                                     | rabbit monoclonal | Cell Signaling        | 4668         | 1/1000   |       |
| JNK1/2                                       | rabbit polyclonal | Cell Signaling        | 9252         | 1/1000   |       |
| $\alpha$ -Tubulin                            | mouse monoclonal  | Sigma-aldrich         | T5168        | 1/1000   |       |
| Ki67                                         | rabbit polyclonal | AbCAM                 | ab15580      |          | 1/500 |
| Cleaved Caspase-3 (Asp175)                   | rabbit polyclonal | Cell Signaling        | 9661         |          | 1/150 |
| Mouse IgG-horseradish peroxidase-conjugated  | goat              | KPL                   | 474-1806     | 1/3000   |       |
| Rabbit IgG-horseradish peroxidase-conjugated | goat              | Jackson immunoReseach | 111-035-144  | 1/3000   |       |
| Biotinylated anti-rabbit IgG                 | horse             | Vector                | BA-1100      |          | 1/150 |

**Supplementary Table 2. Primary and secondary antibodies used in the study.**

# Blots of Figure 1d

NIC

| Wild Type |   |   | PKR <sup>-/-</sup> |   |   | elf2α <sup>S/A</sup> |   |   |
|-----------|---|---|--------------------|---|---|----------------------|---|---|
| 1         | 2 | 3 | 4                  | 5 | 6 | 7                    | 8 | 9 |

Antibodies

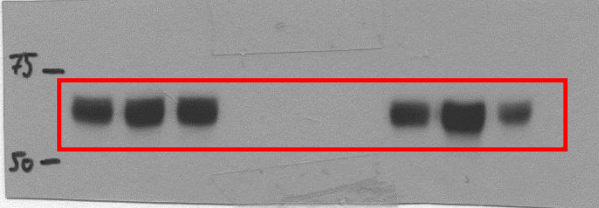

PKR (68kd)

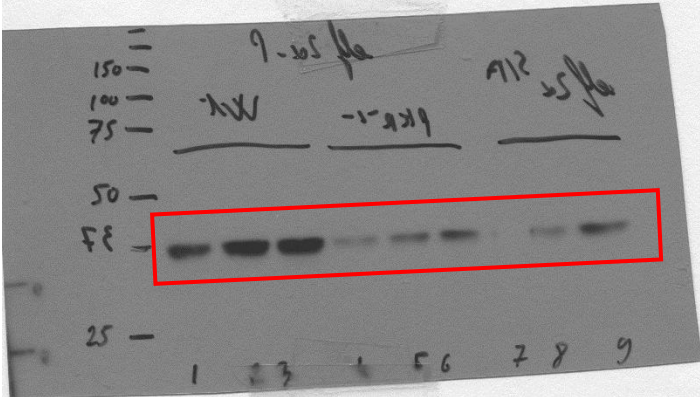

elf2α-P (Ser 51) (37kd)

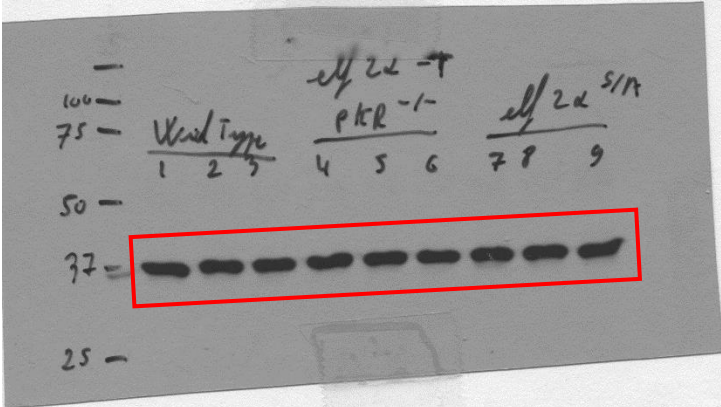

elf2α (37kd)

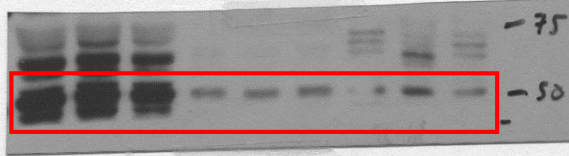

ATF4 (50kd)

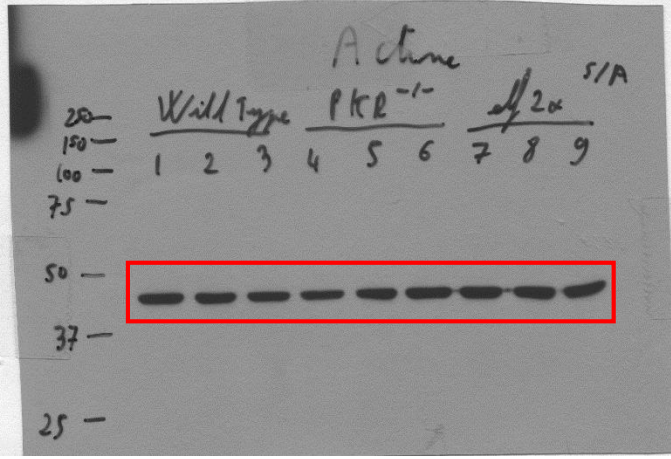

Actin (42kd)

# Blots of Figure 2d

Figure 2 d: NIC cells, CRISPR/Cas 9 PKR<sup>-/-</sup>A

experiment 1

1/3

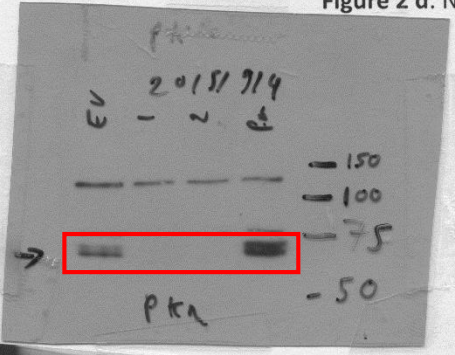

PKR (68kd)

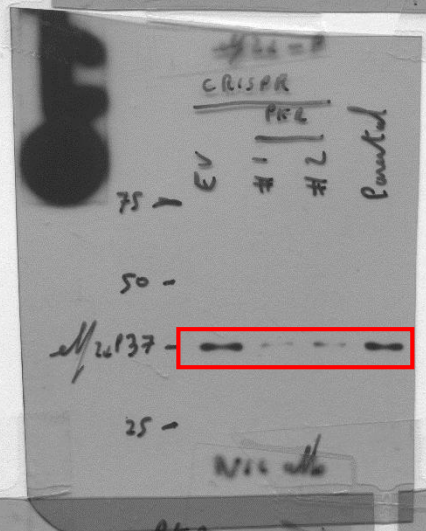

eIF2α-P (37kd)

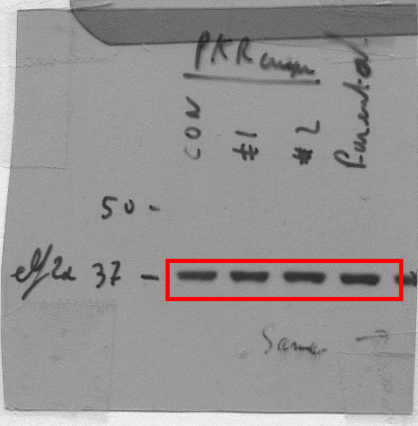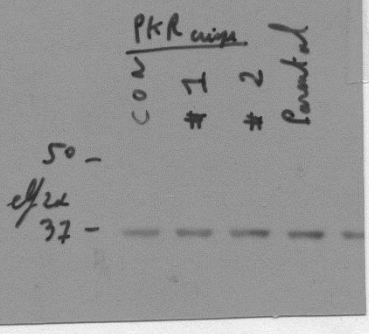

eIF2α (37kd)

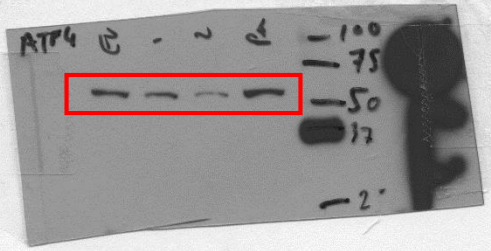

ATF4 (50kd)

Blots of Figure 2d (cont'd)

2/3

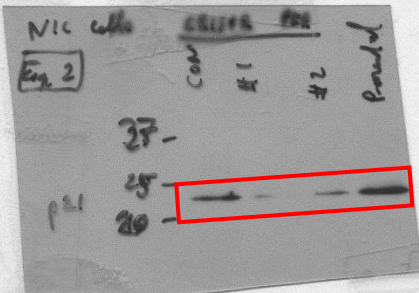

p21 (21 kd)

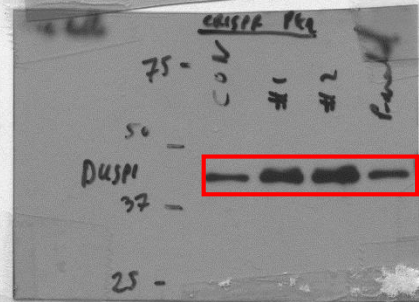

DUSP1 (45 kd)

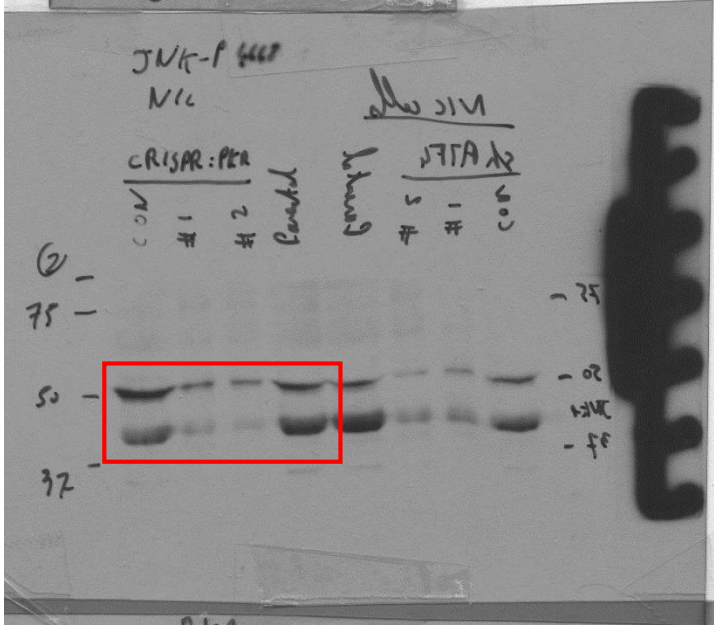

JNK1/2 (46/54 kd)

Exp 1 + sh ATF4

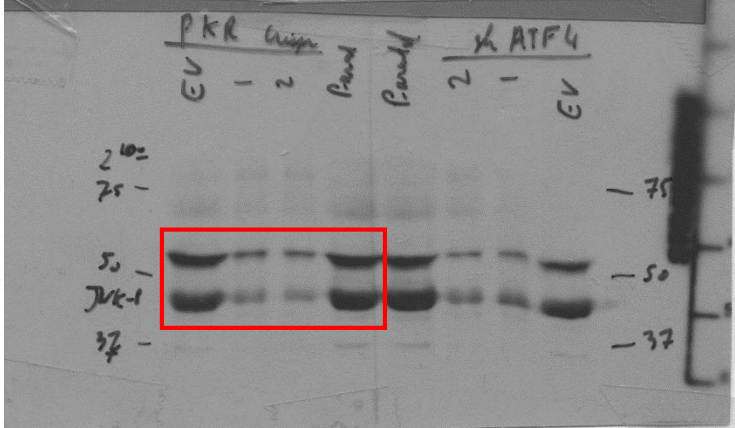

JNK 1/2 other exp online

**Blots of Figure 2d (cont'd)**

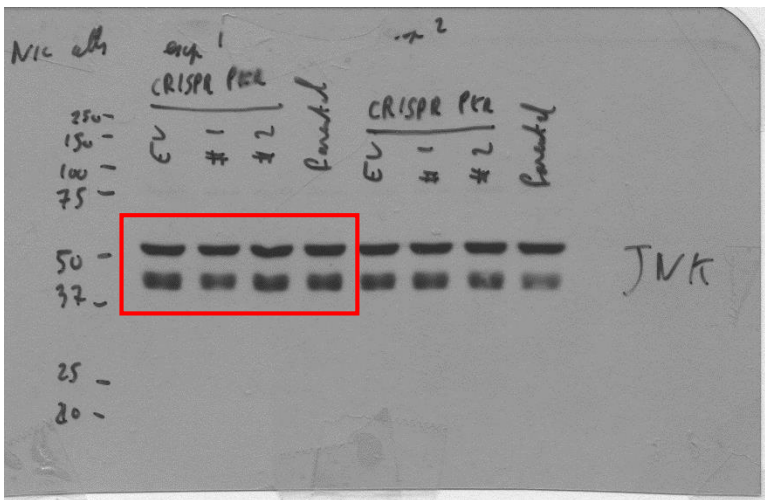

JNK1/2 (46/54kd)  
exp 1 + 2

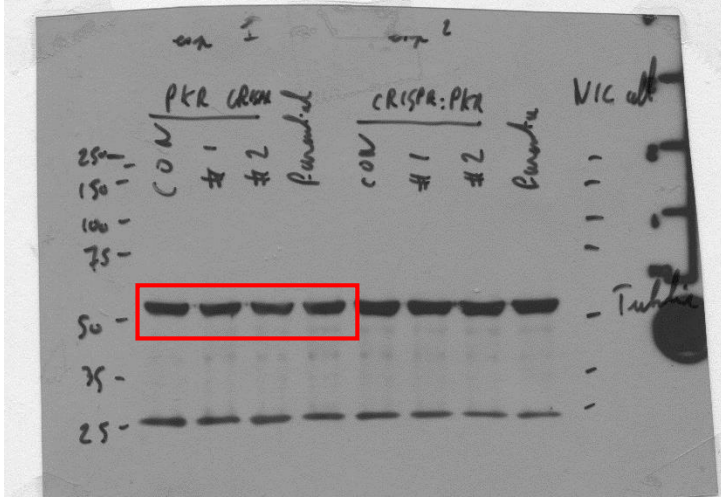

Tubulin (52 kd)  
exp 1 + 2

# Blots of Figure 3a

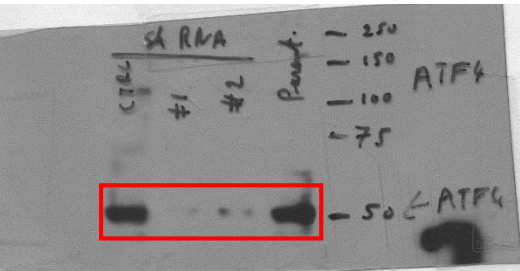

ATF4 (50kd)

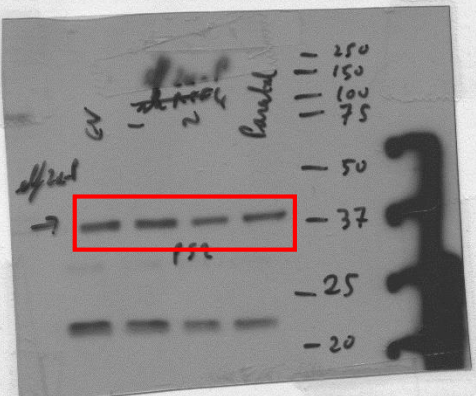

eff 2α - P (37 kd)

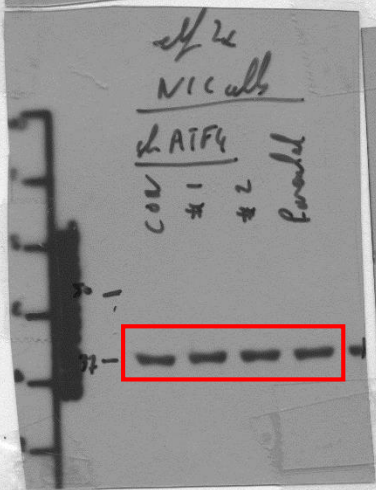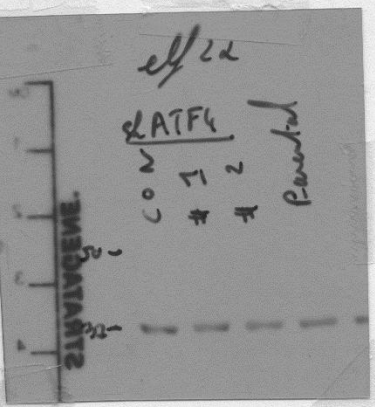

eff 2α (37kd)

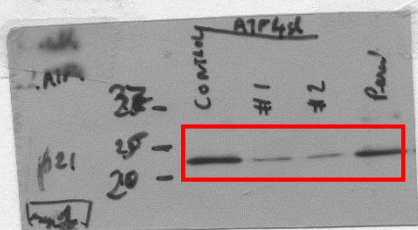

p 21 (kd)



Blots of Figure 3a (cont'd)

2/2

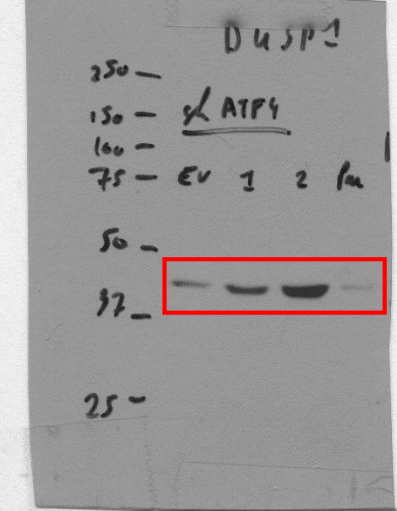

DUSP1 (45kd)

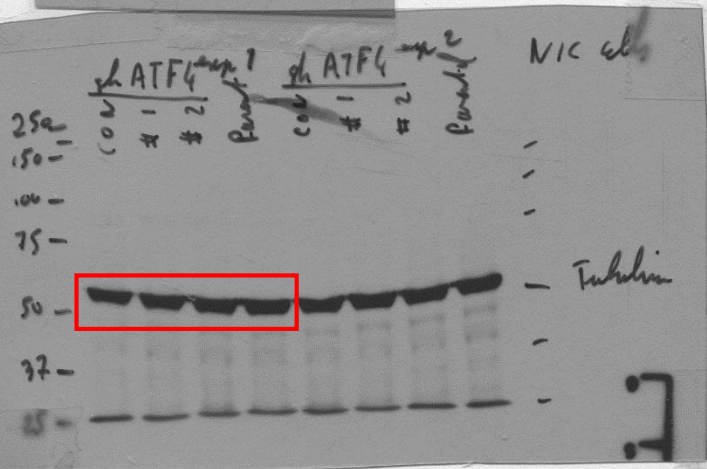

Tubulin (52kd)  
exp 1+2

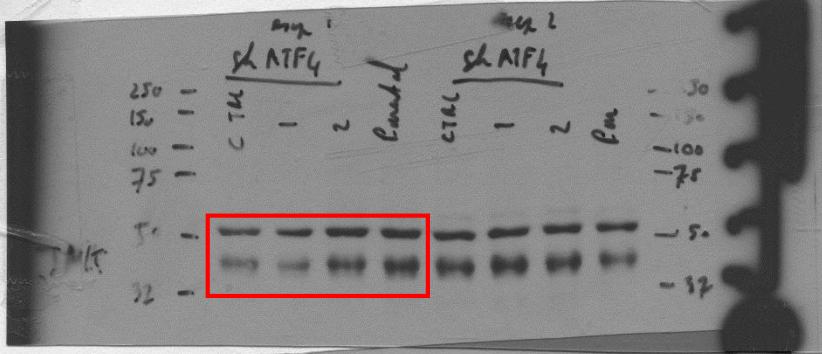

JNK (46-54kd)  
exp 1+2 (#9252)

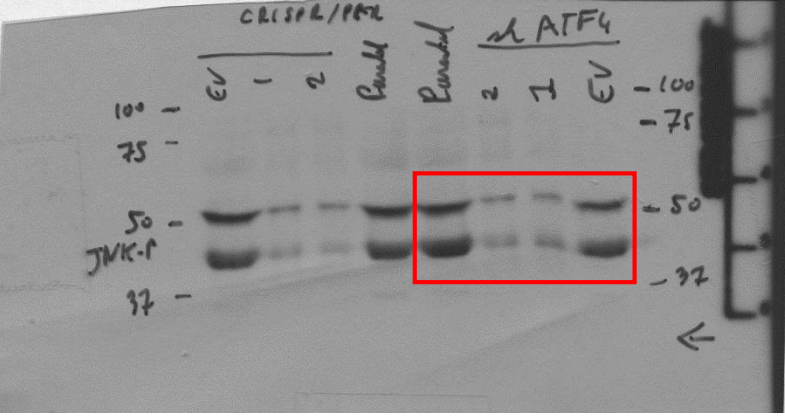

JNK-P (#4668)  
(46-54kd)  
the expression  
in page CRISPR/PLA

# Blots of Figure 4a

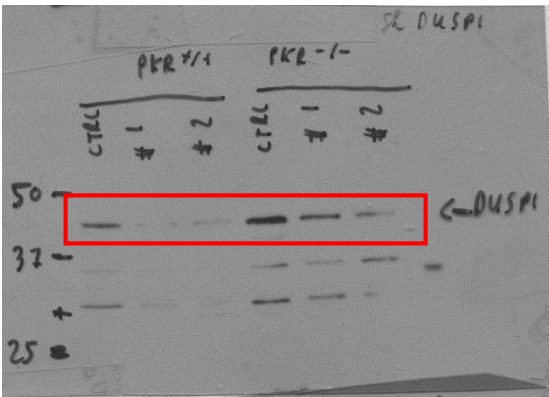

USP1 (45 kD)

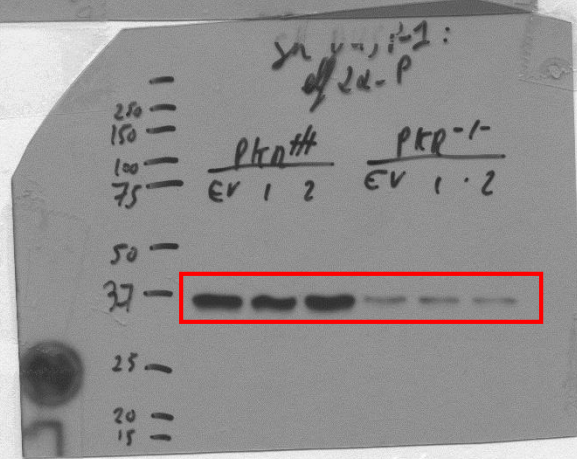

eIF2α-P (37 kD)

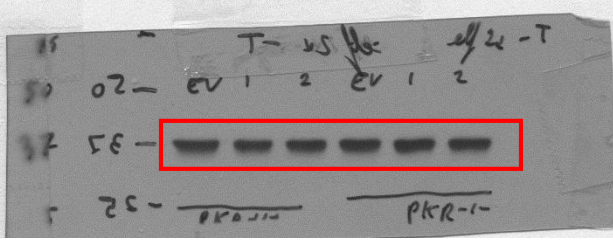

eIF2α (37 kD)

**Blots of Figure 4a (cont'd)**

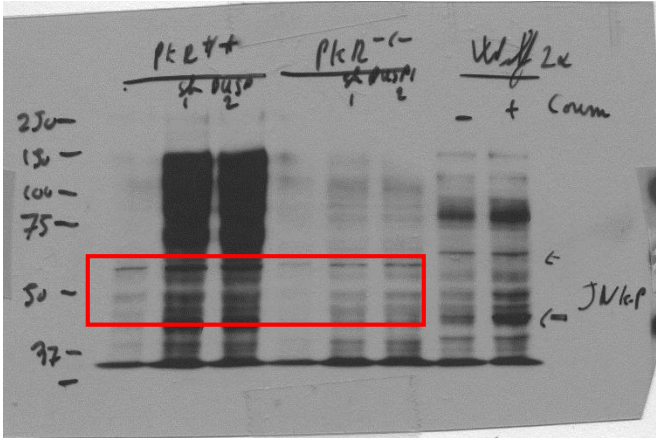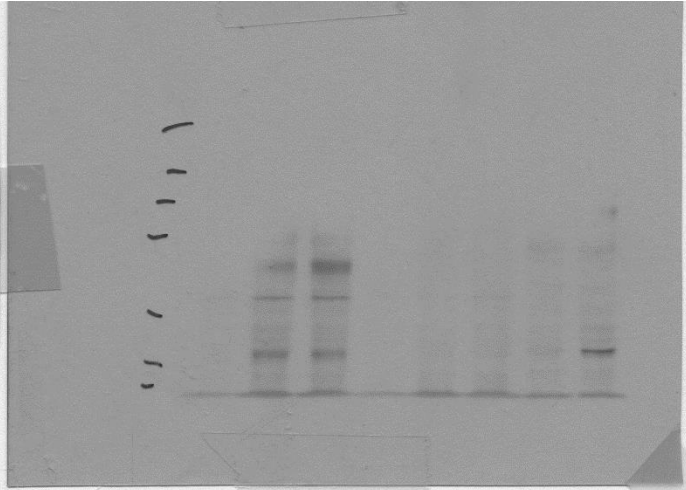

JNK- $\beta$  (#9251) (46-54 kD)

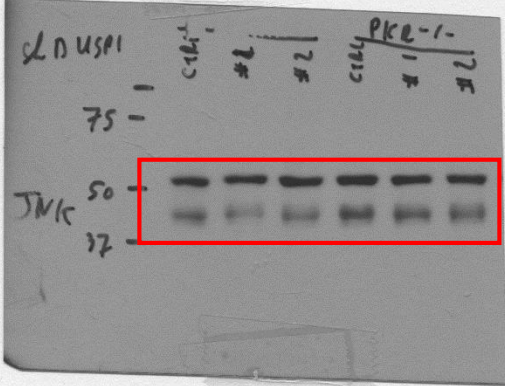

JNK1/2 (46-54 kD)

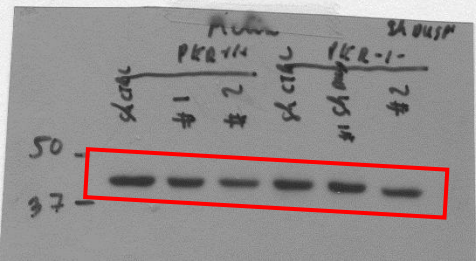

$\beta$ -Actin (45 kD)

# Blots of Figure 5a

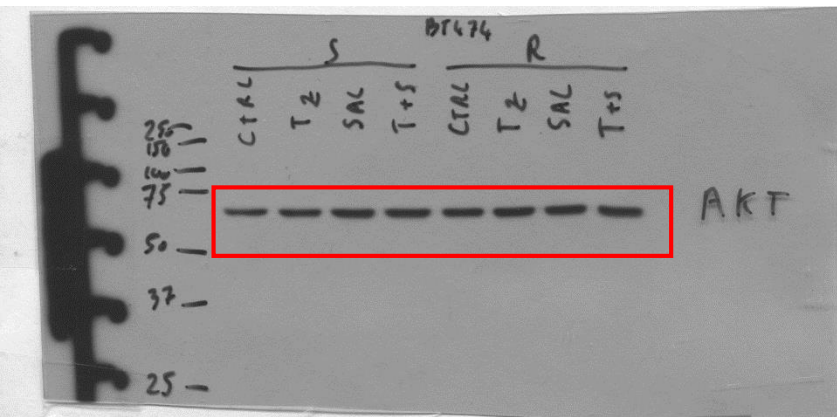

AKT ( kDa)

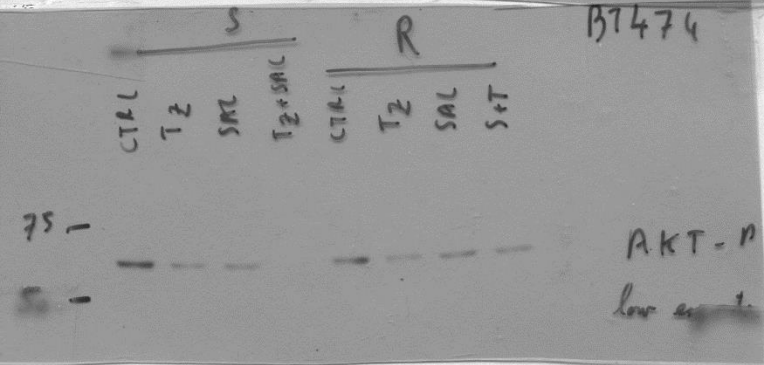

AKT-P  
low exp.

AKT-P

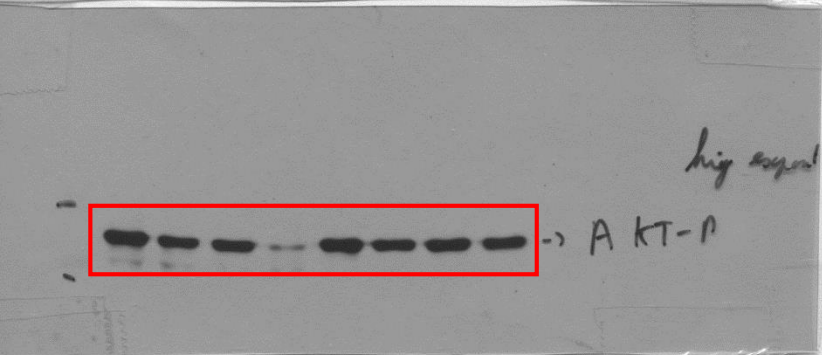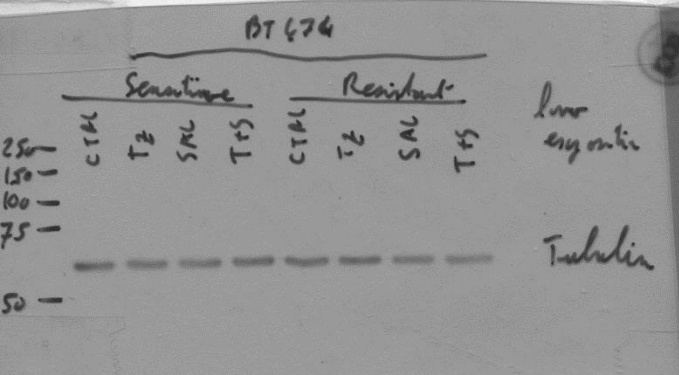

low exposure

Tubulin

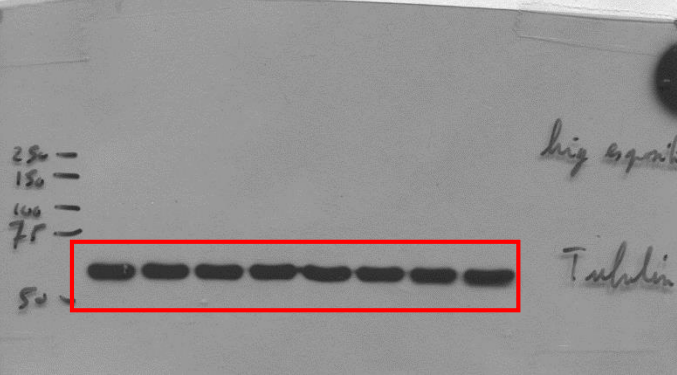

**Blots of Figure 5a (cont'd)**

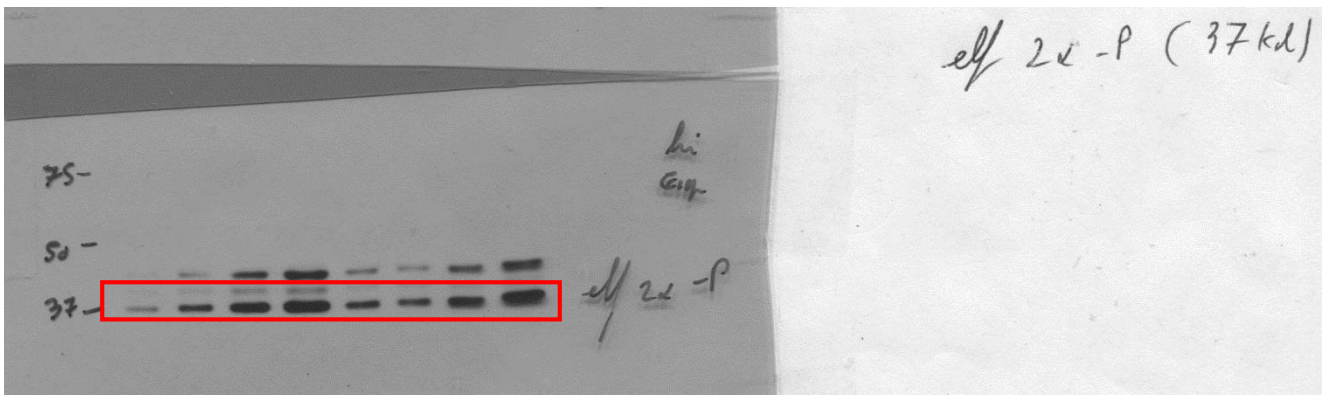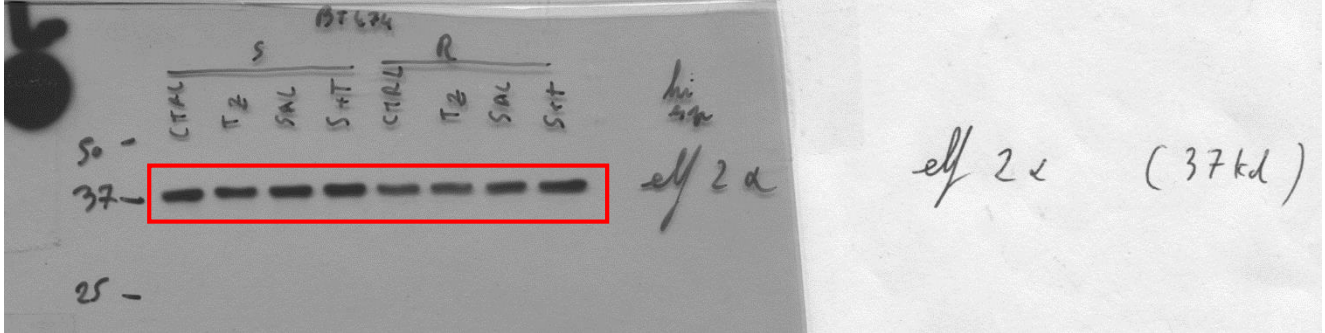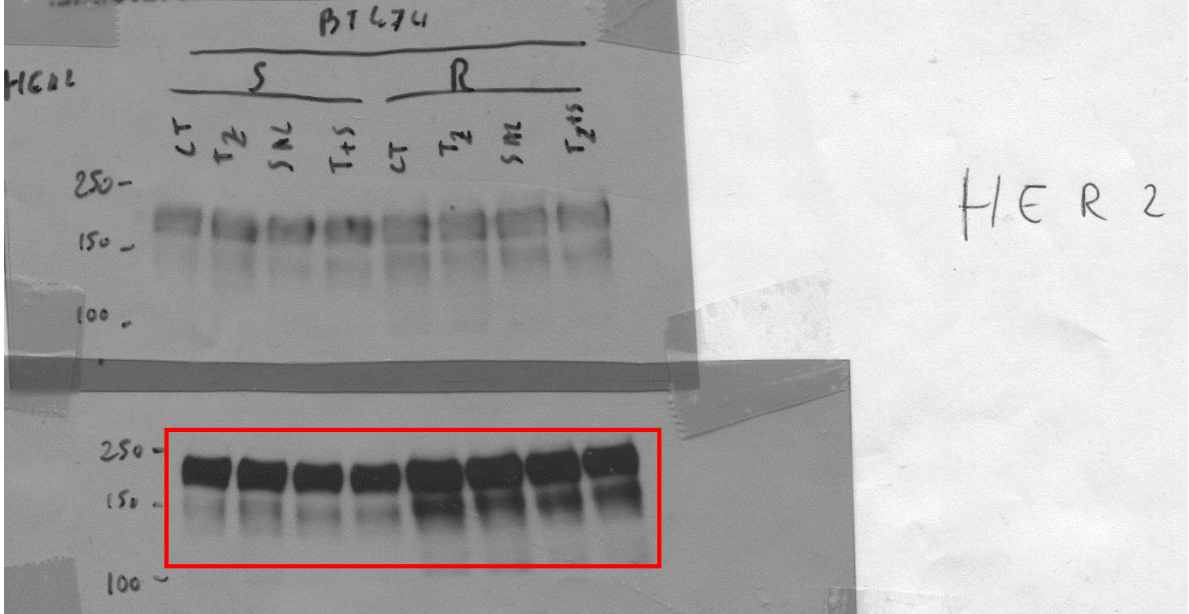

**Blots of Figure 5a (cont'd)**

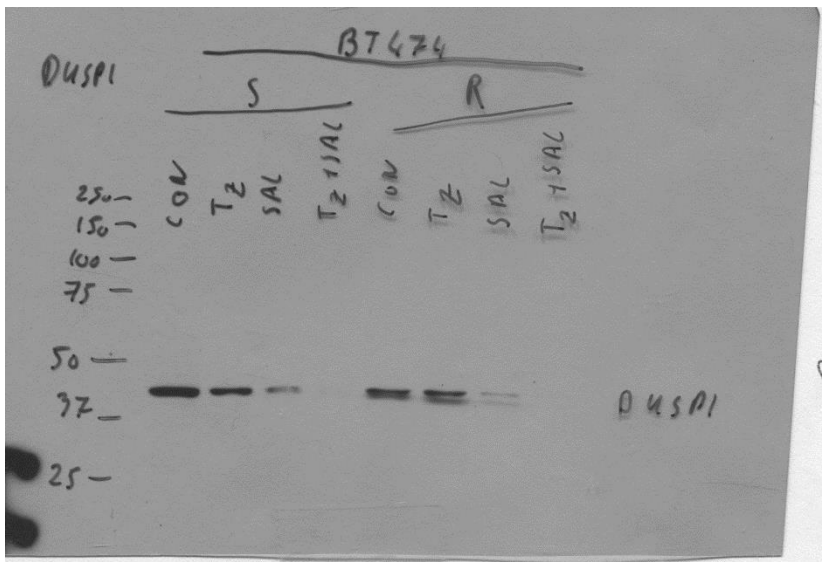

DUSP1 (45 kDa)

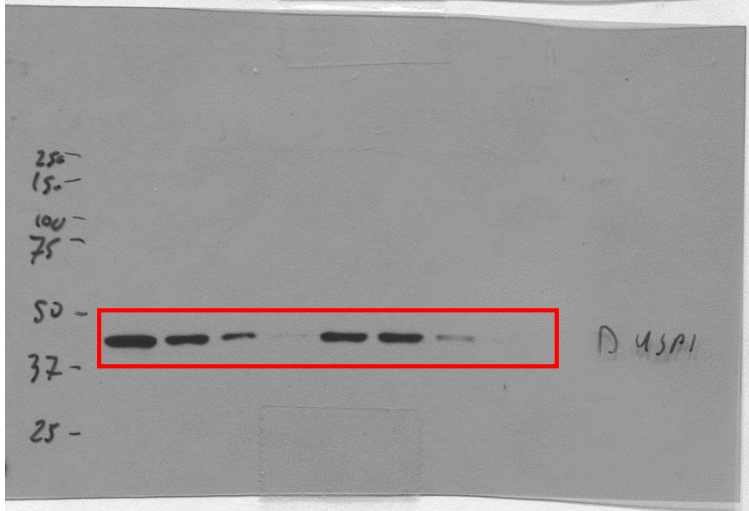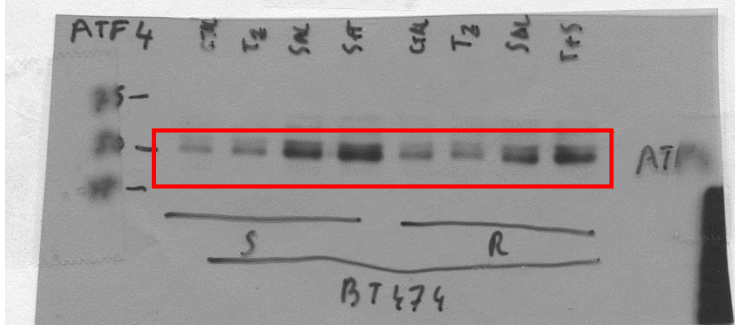

ATF4 (50 kDa)

**Blots of Figure 5a (cont'd)**

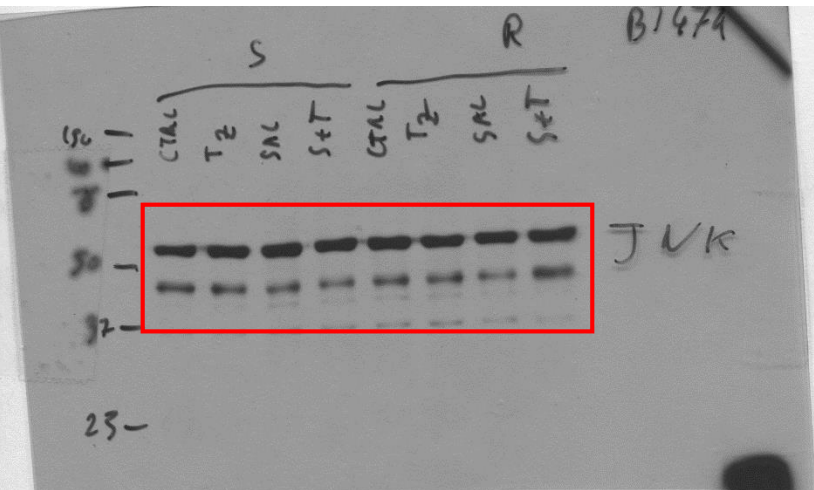

JNK (46-54 kDa)

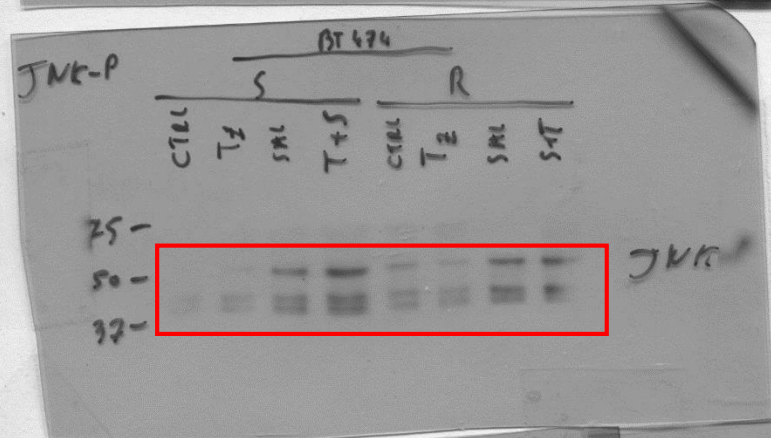

JNK-P (46-54 kDa)

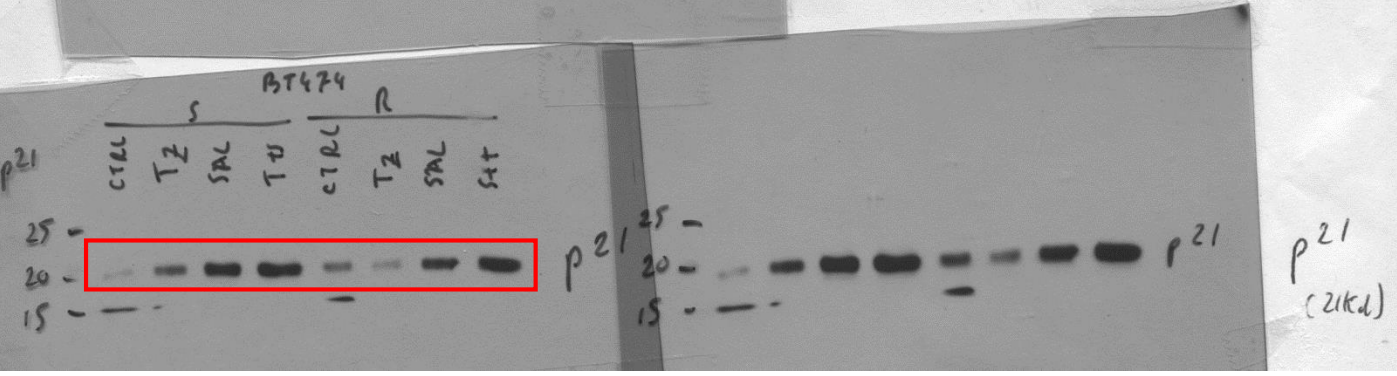

p21 (21 kDa)

# Blots of Supplementary Figure 1

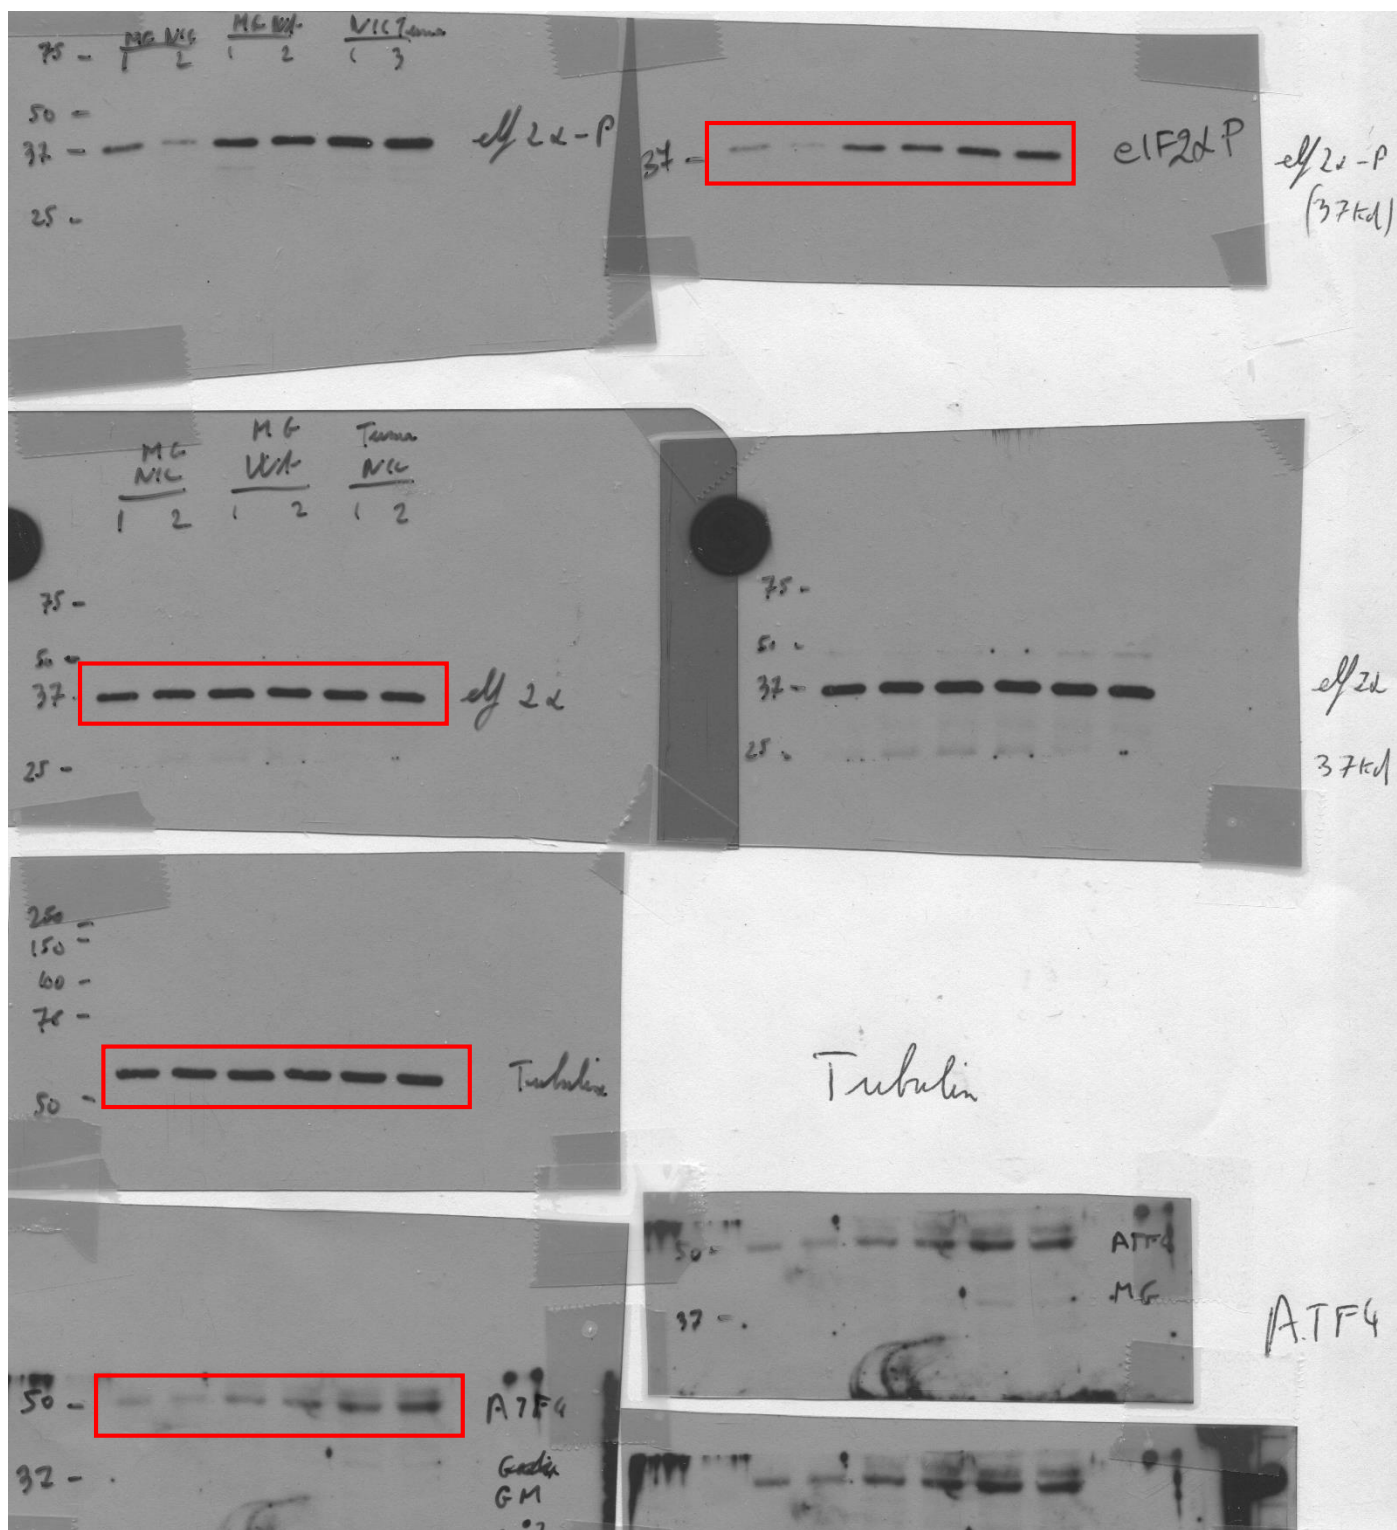



# Blots of Supplementary Figure 1 (cont'd)

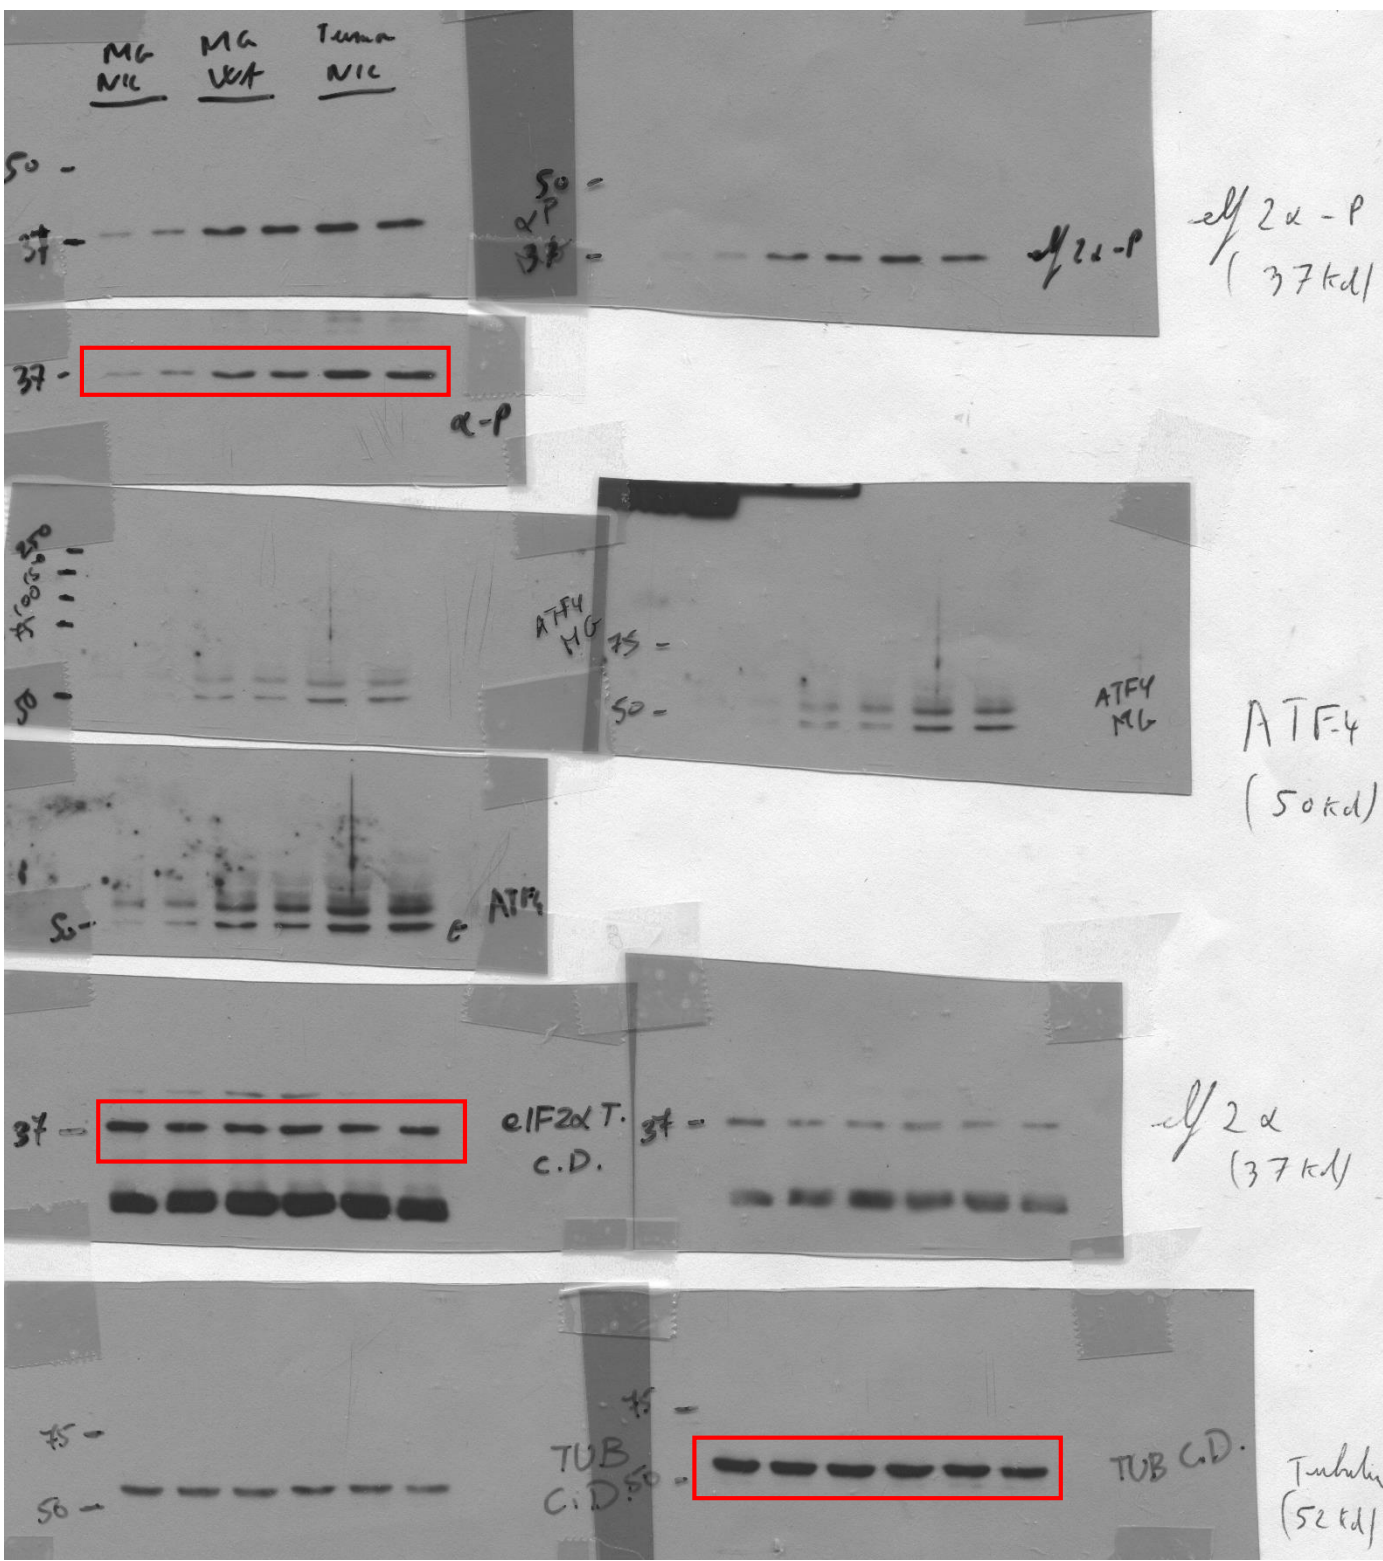

# Blots of Supplementary Figure 4

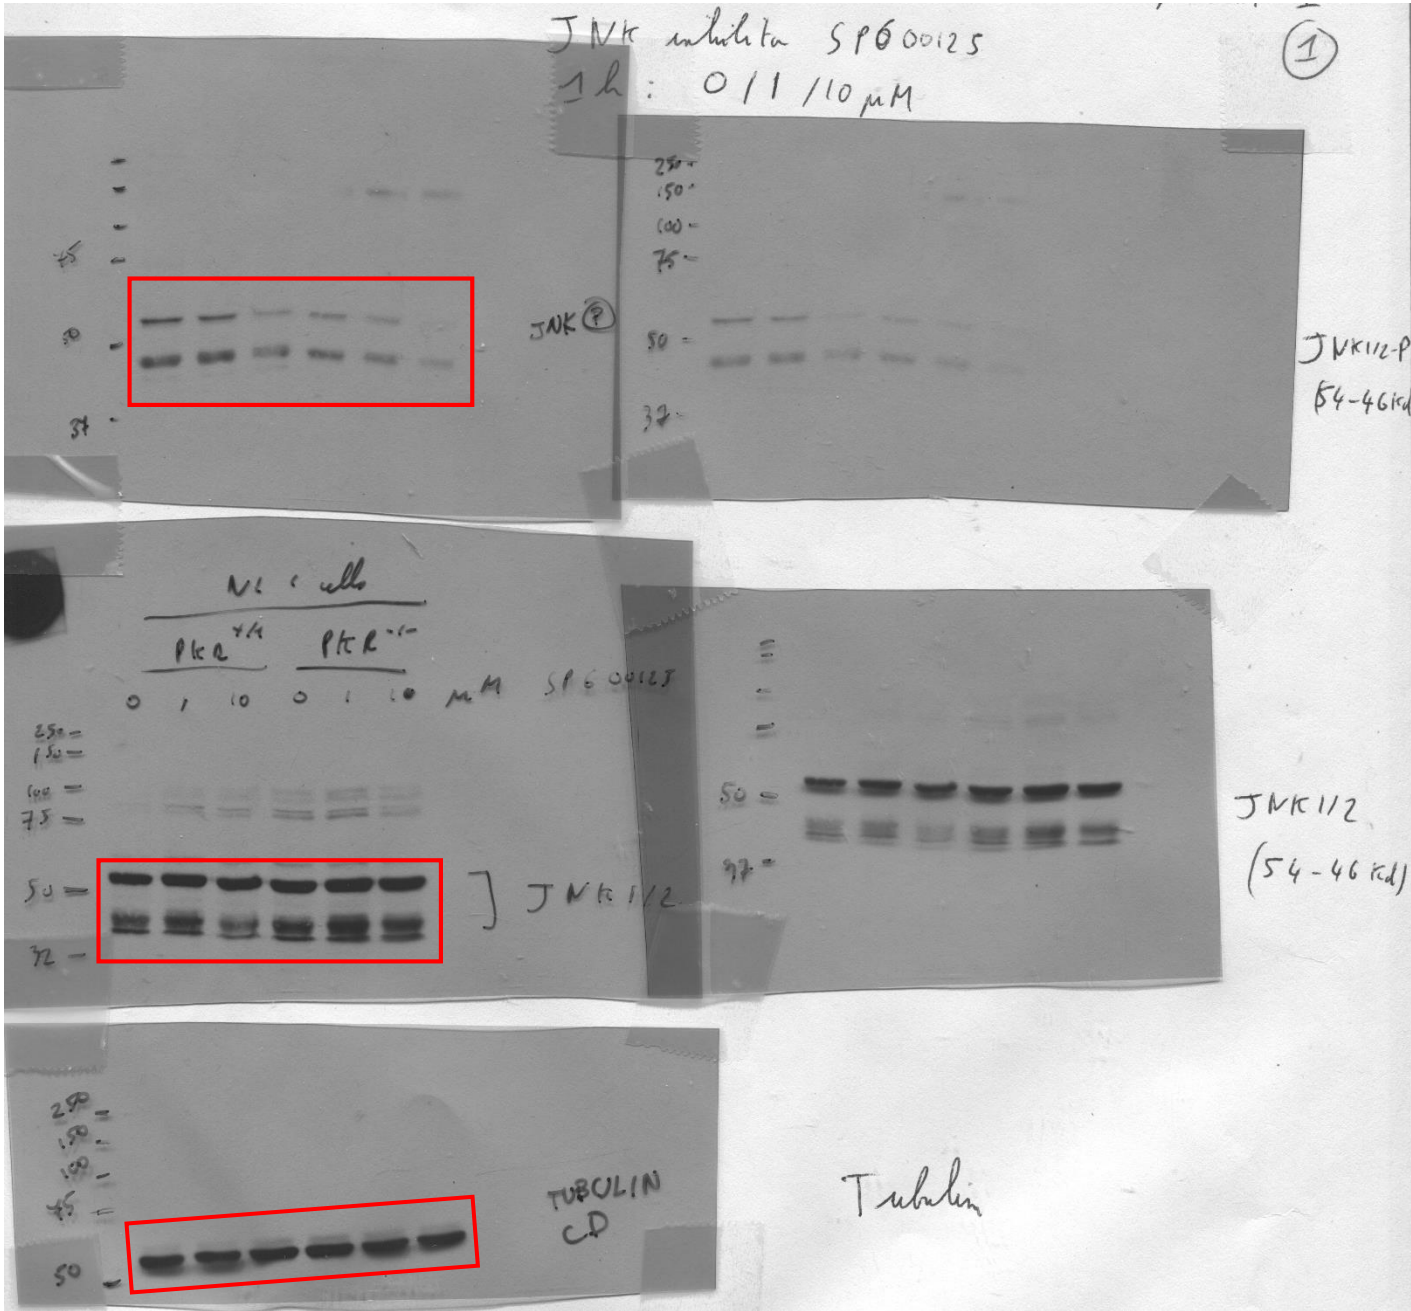

# Blots of Supplementary Figure 4 (cont'd)

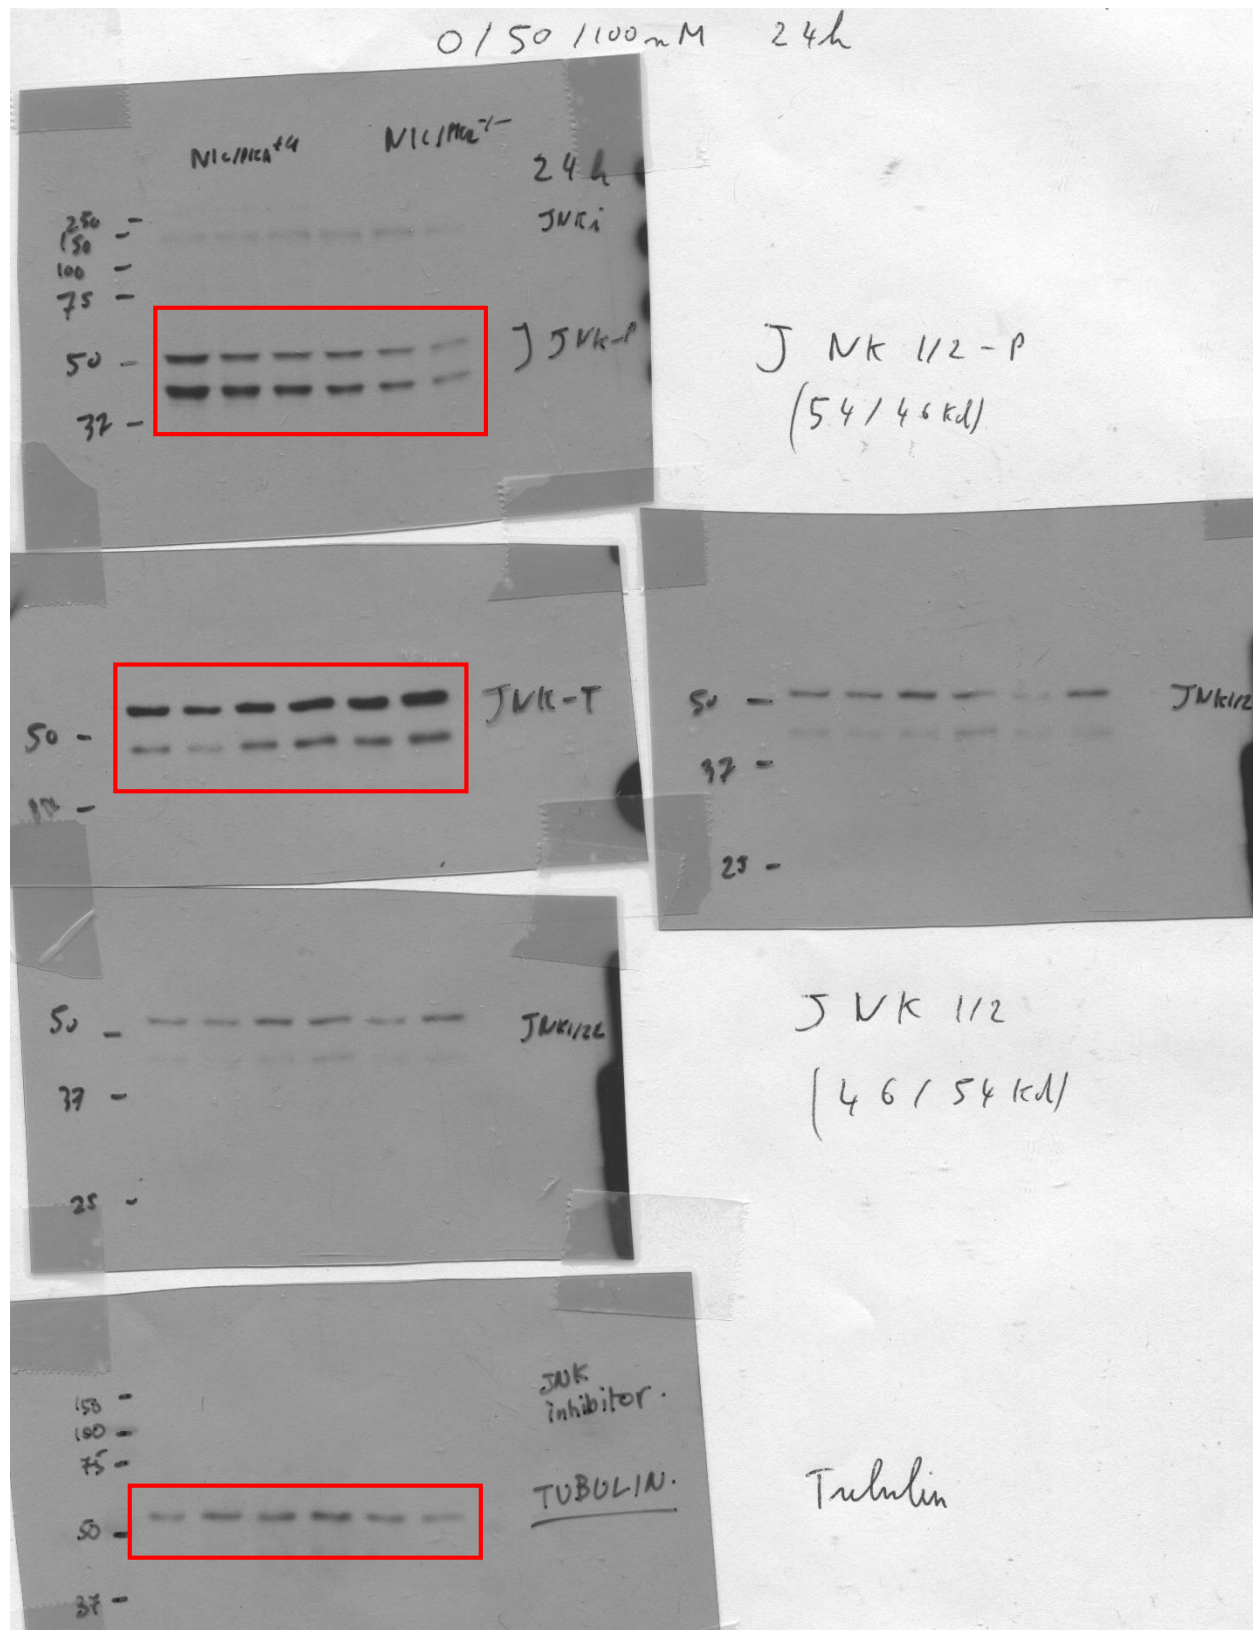

# Blots of Supplementary Figure 5a

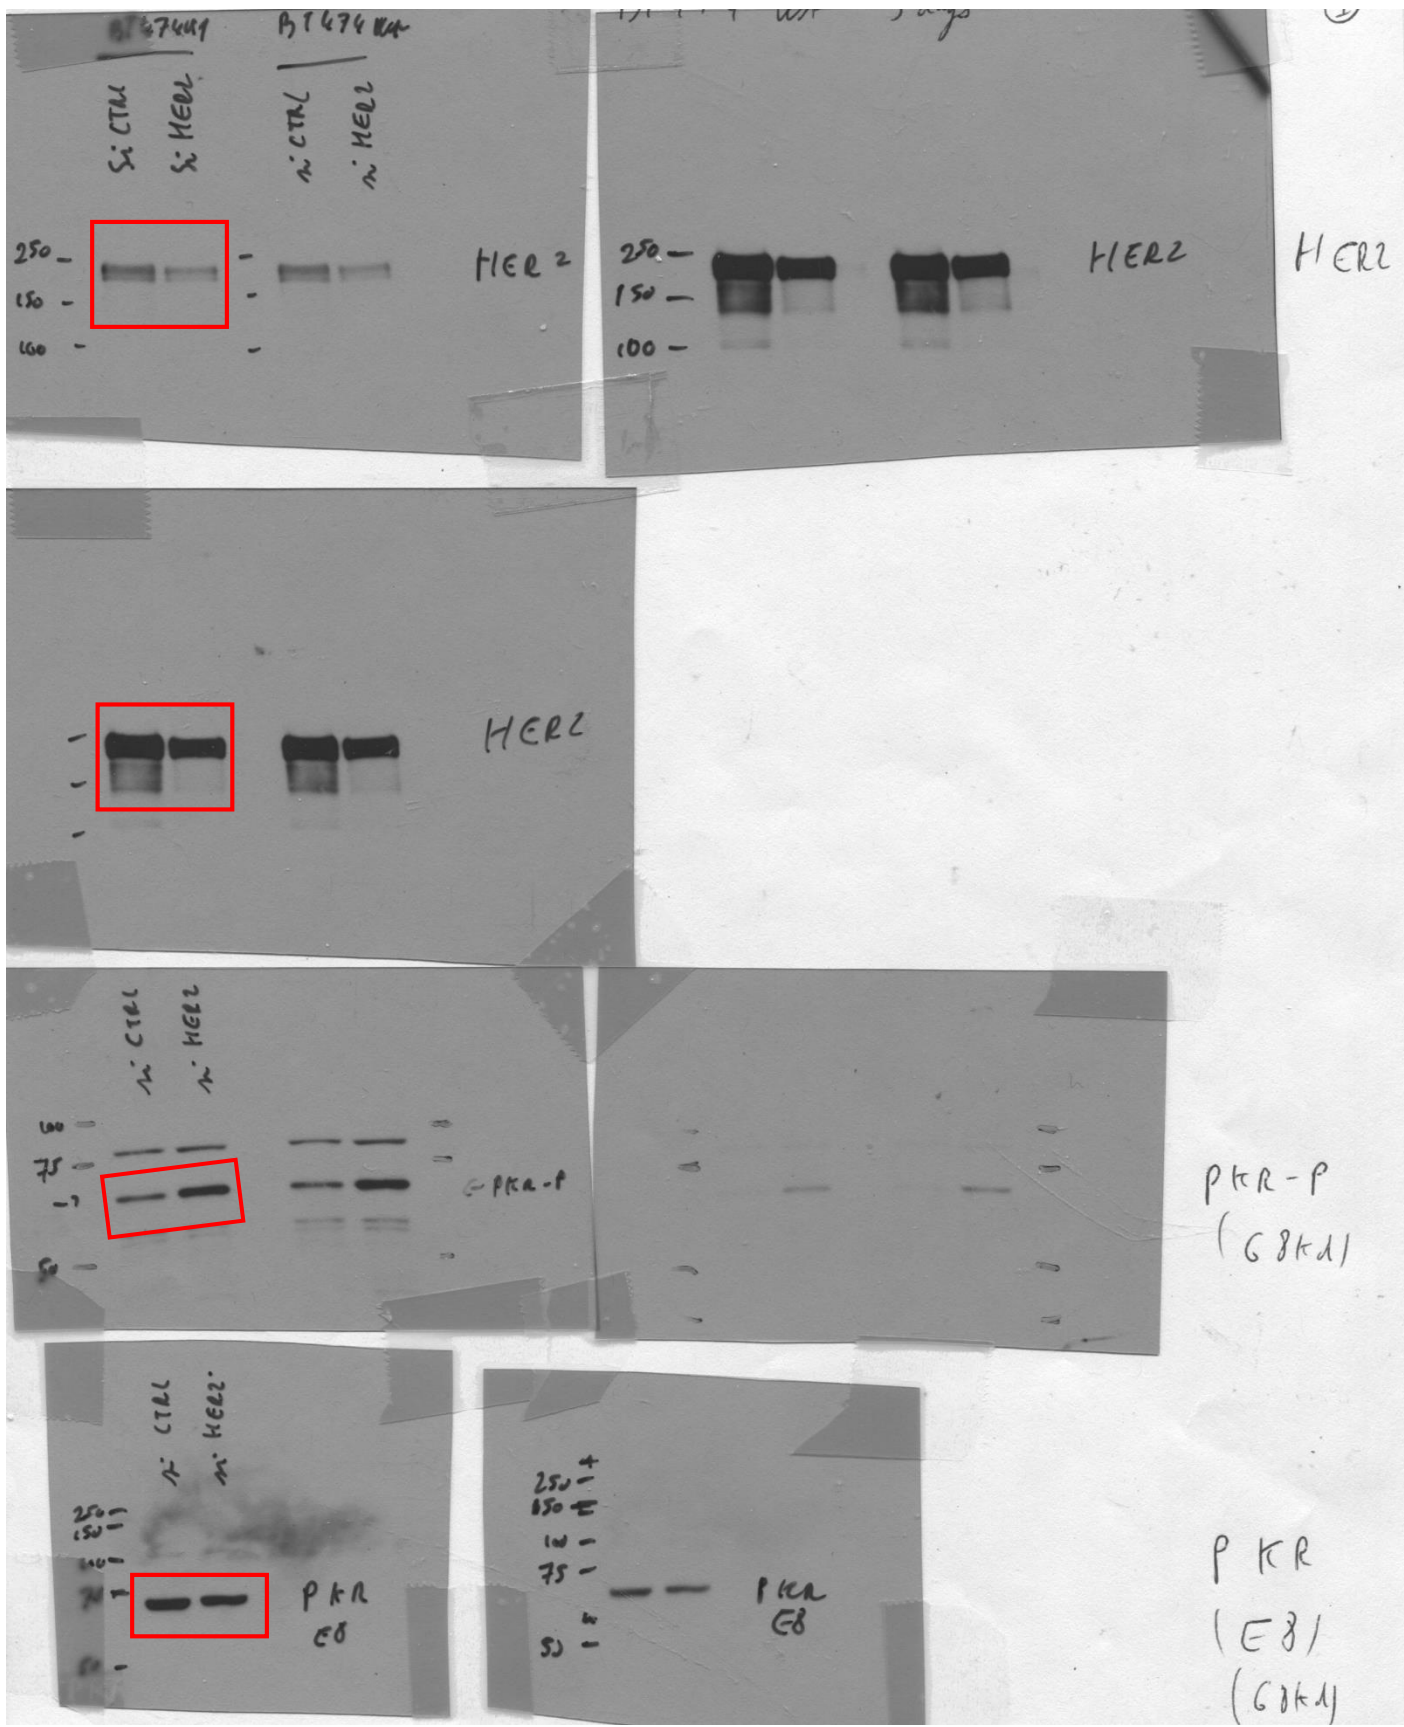

# Blots of Supplementary Figure 5a (cont'd)

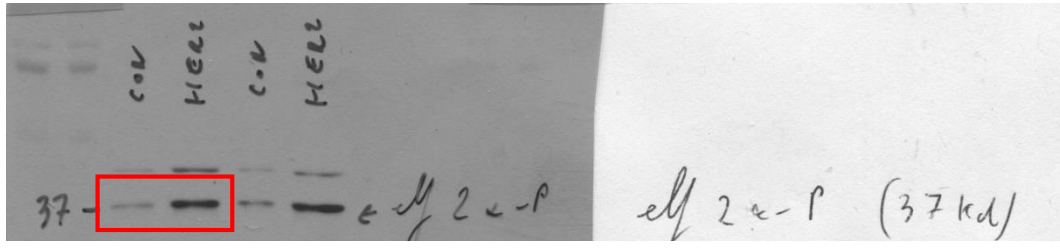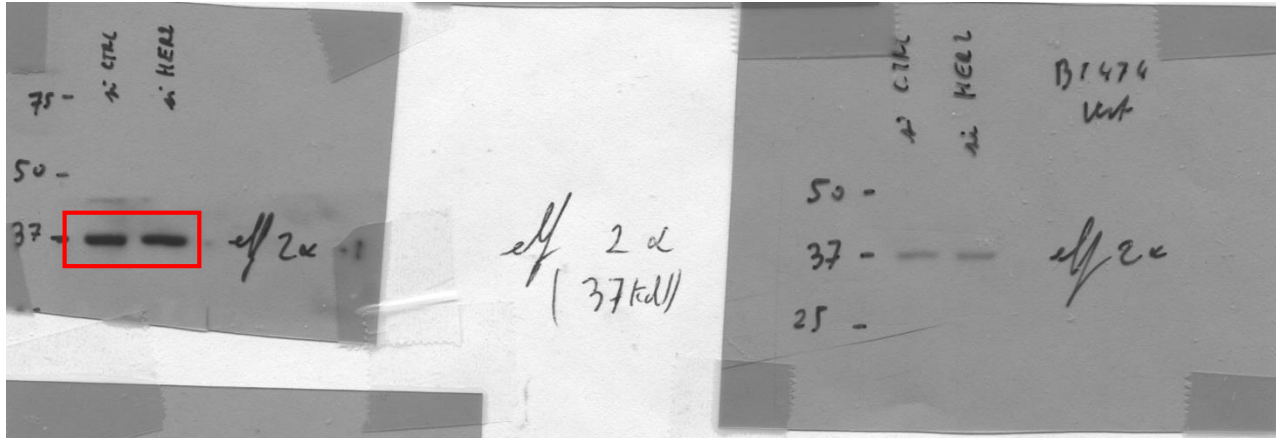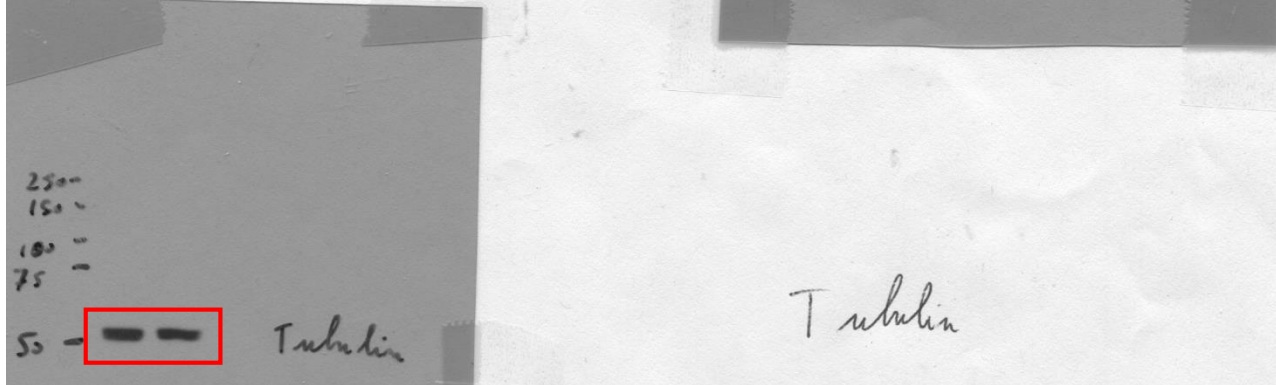

# Blots of Supplementary Figure 5b

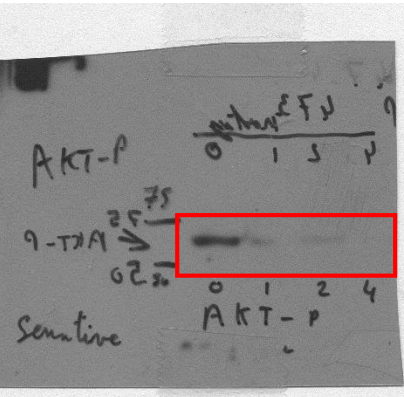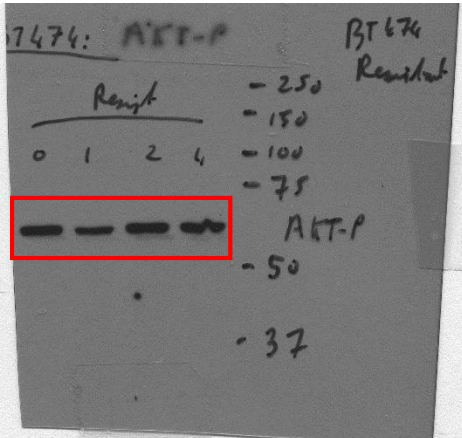

13  
AKT-P (60kd)

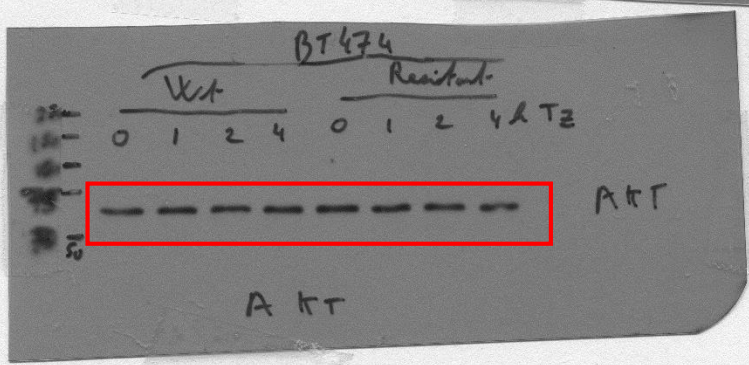

AKT (60kd)

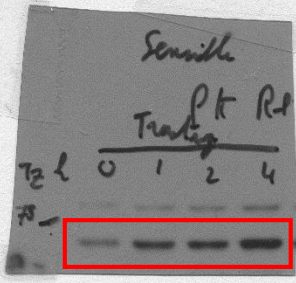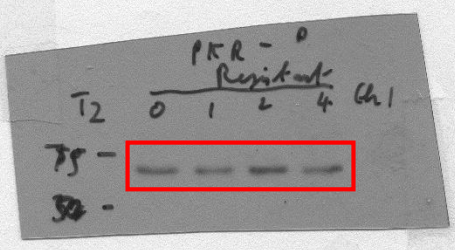

PKR-P (68kd)

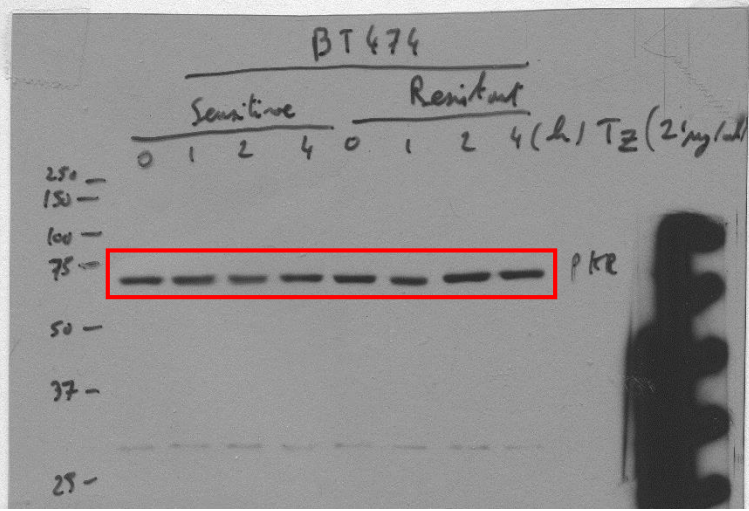

PKP (68kd)

# Blot of Supplementary Figure 5b (cont'd)

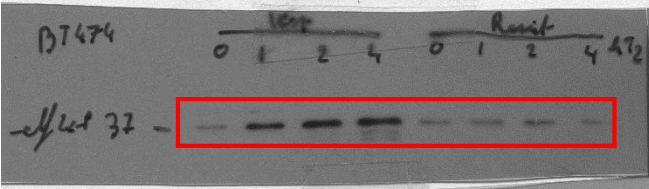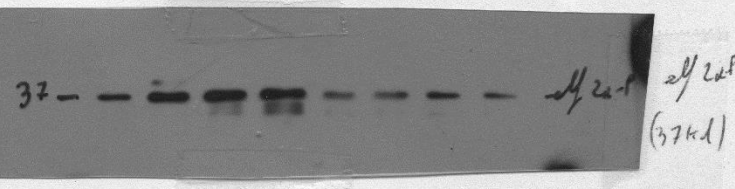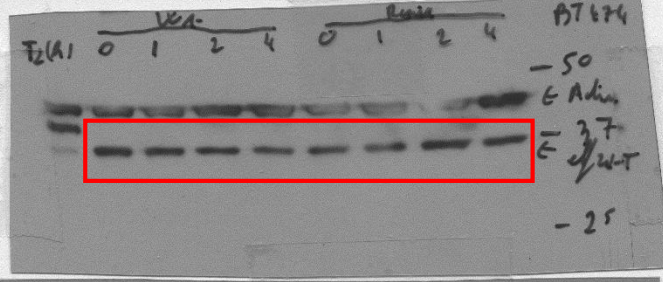

elf 2d (37kd)

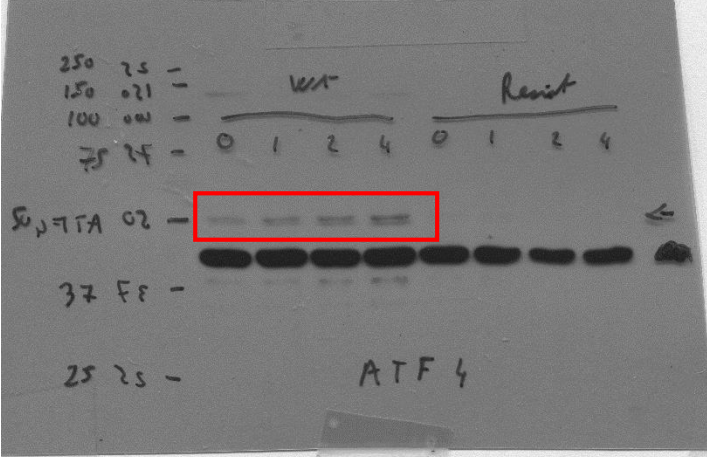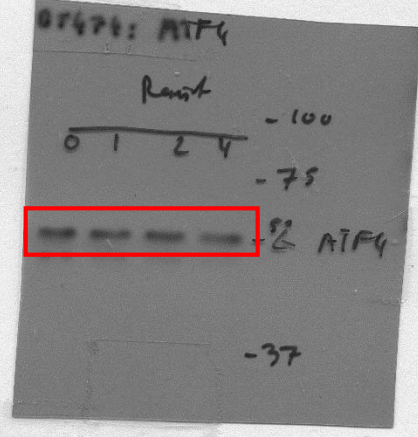

ATF 4 (50kd)

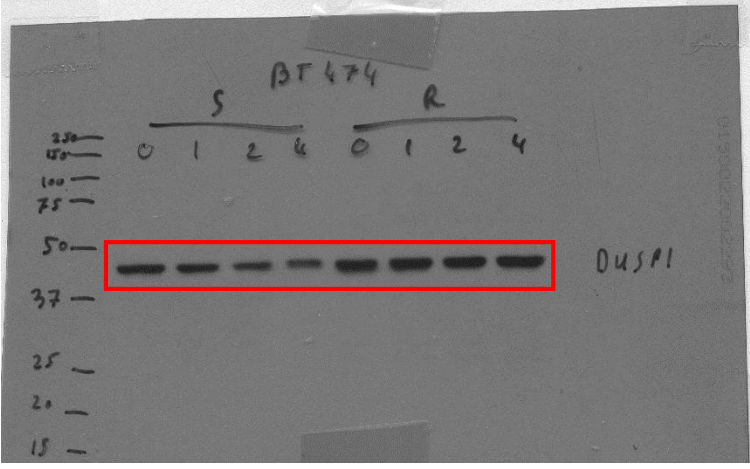

DUSP 1 (45kd)

**Blots of Supplementary Figure 5b (cont'd)**

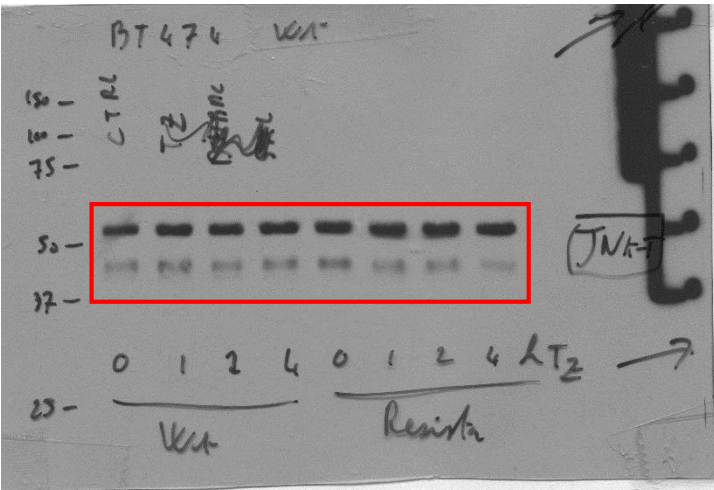

JNK1/2 (46/54kd)

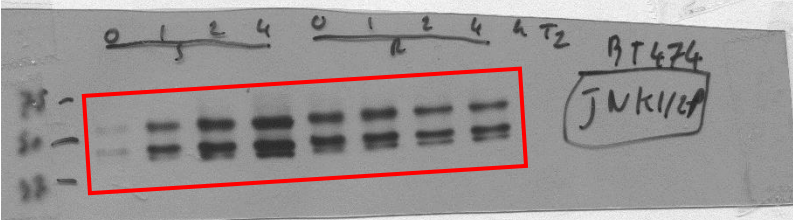

JNK1/2-P (46/54kd)

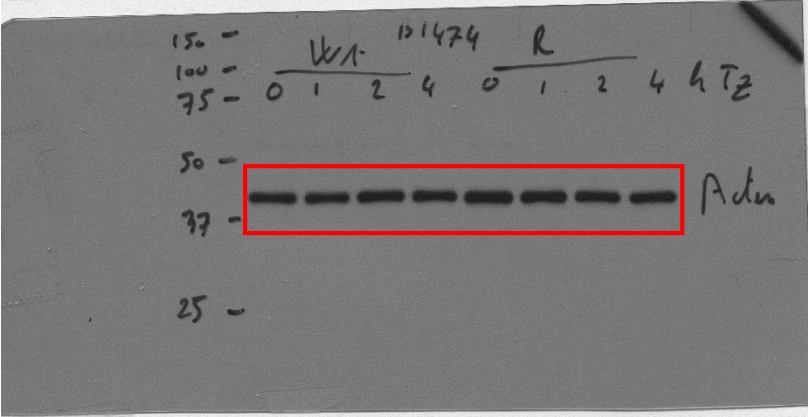

beta-Actin (45kd)

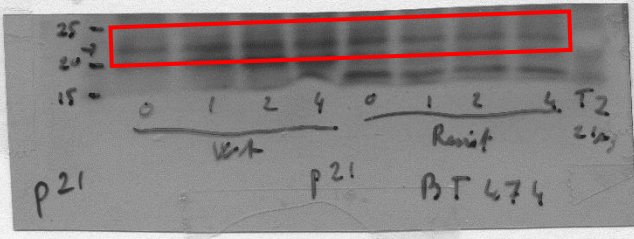

p21 (21kd)



# Blots of Supplementary Figure 7

PDX Gastric Tera 2  
Vehicle / T2 / SAC / SAC+T2  
1/2 / 1/2 / 1/2 / 1/2

Exp 2 (1)

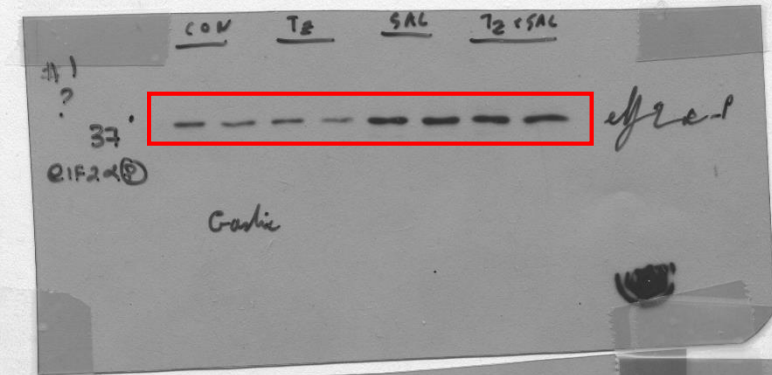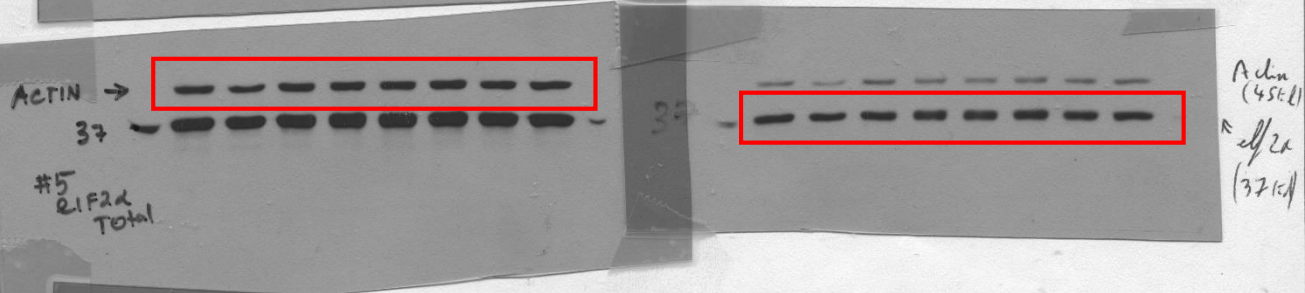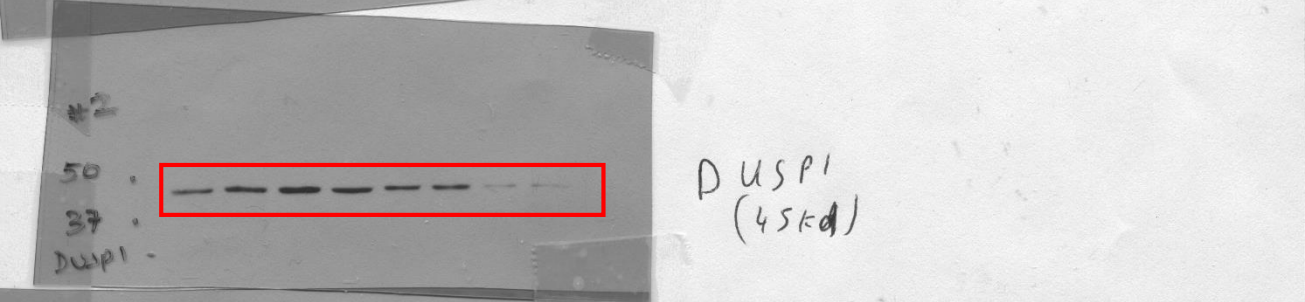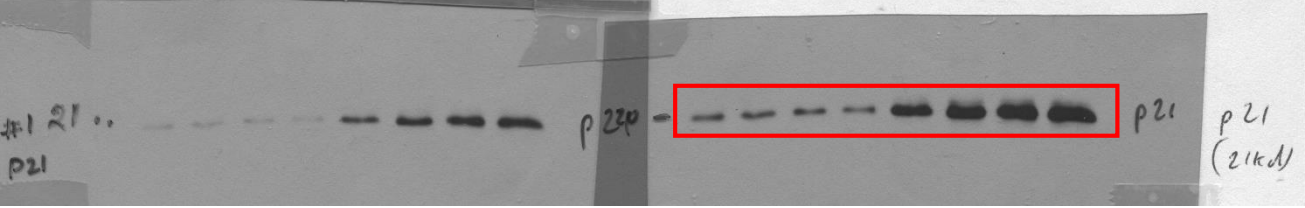

# Blot of Supplementary Figure 7 (cont'd)

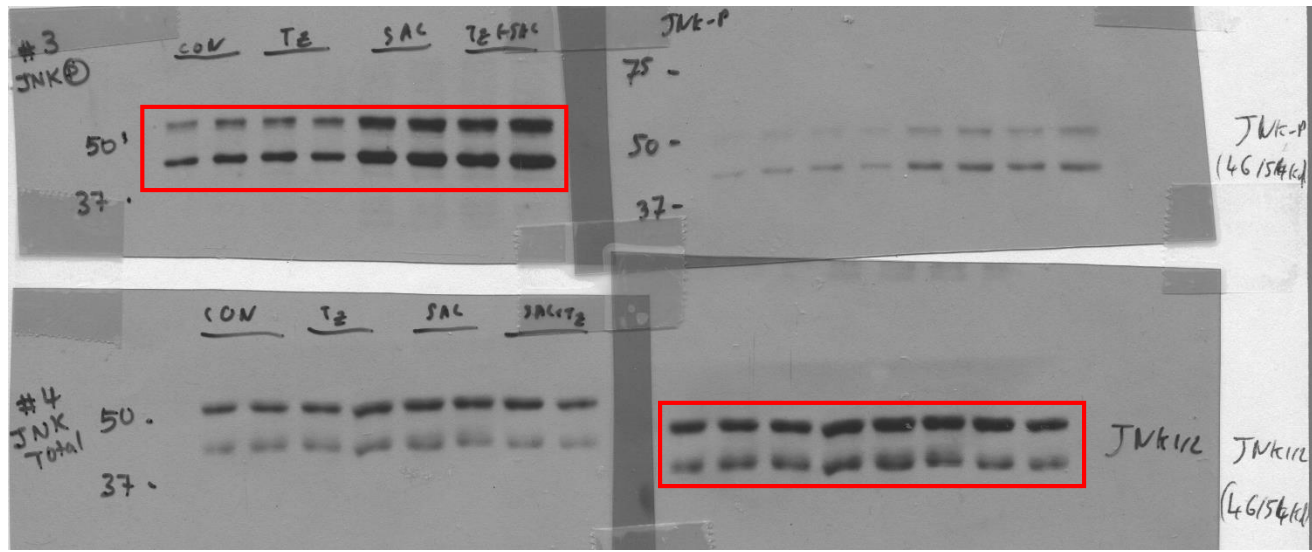

# Blots of Supplementary Figure 7 (cont'd)

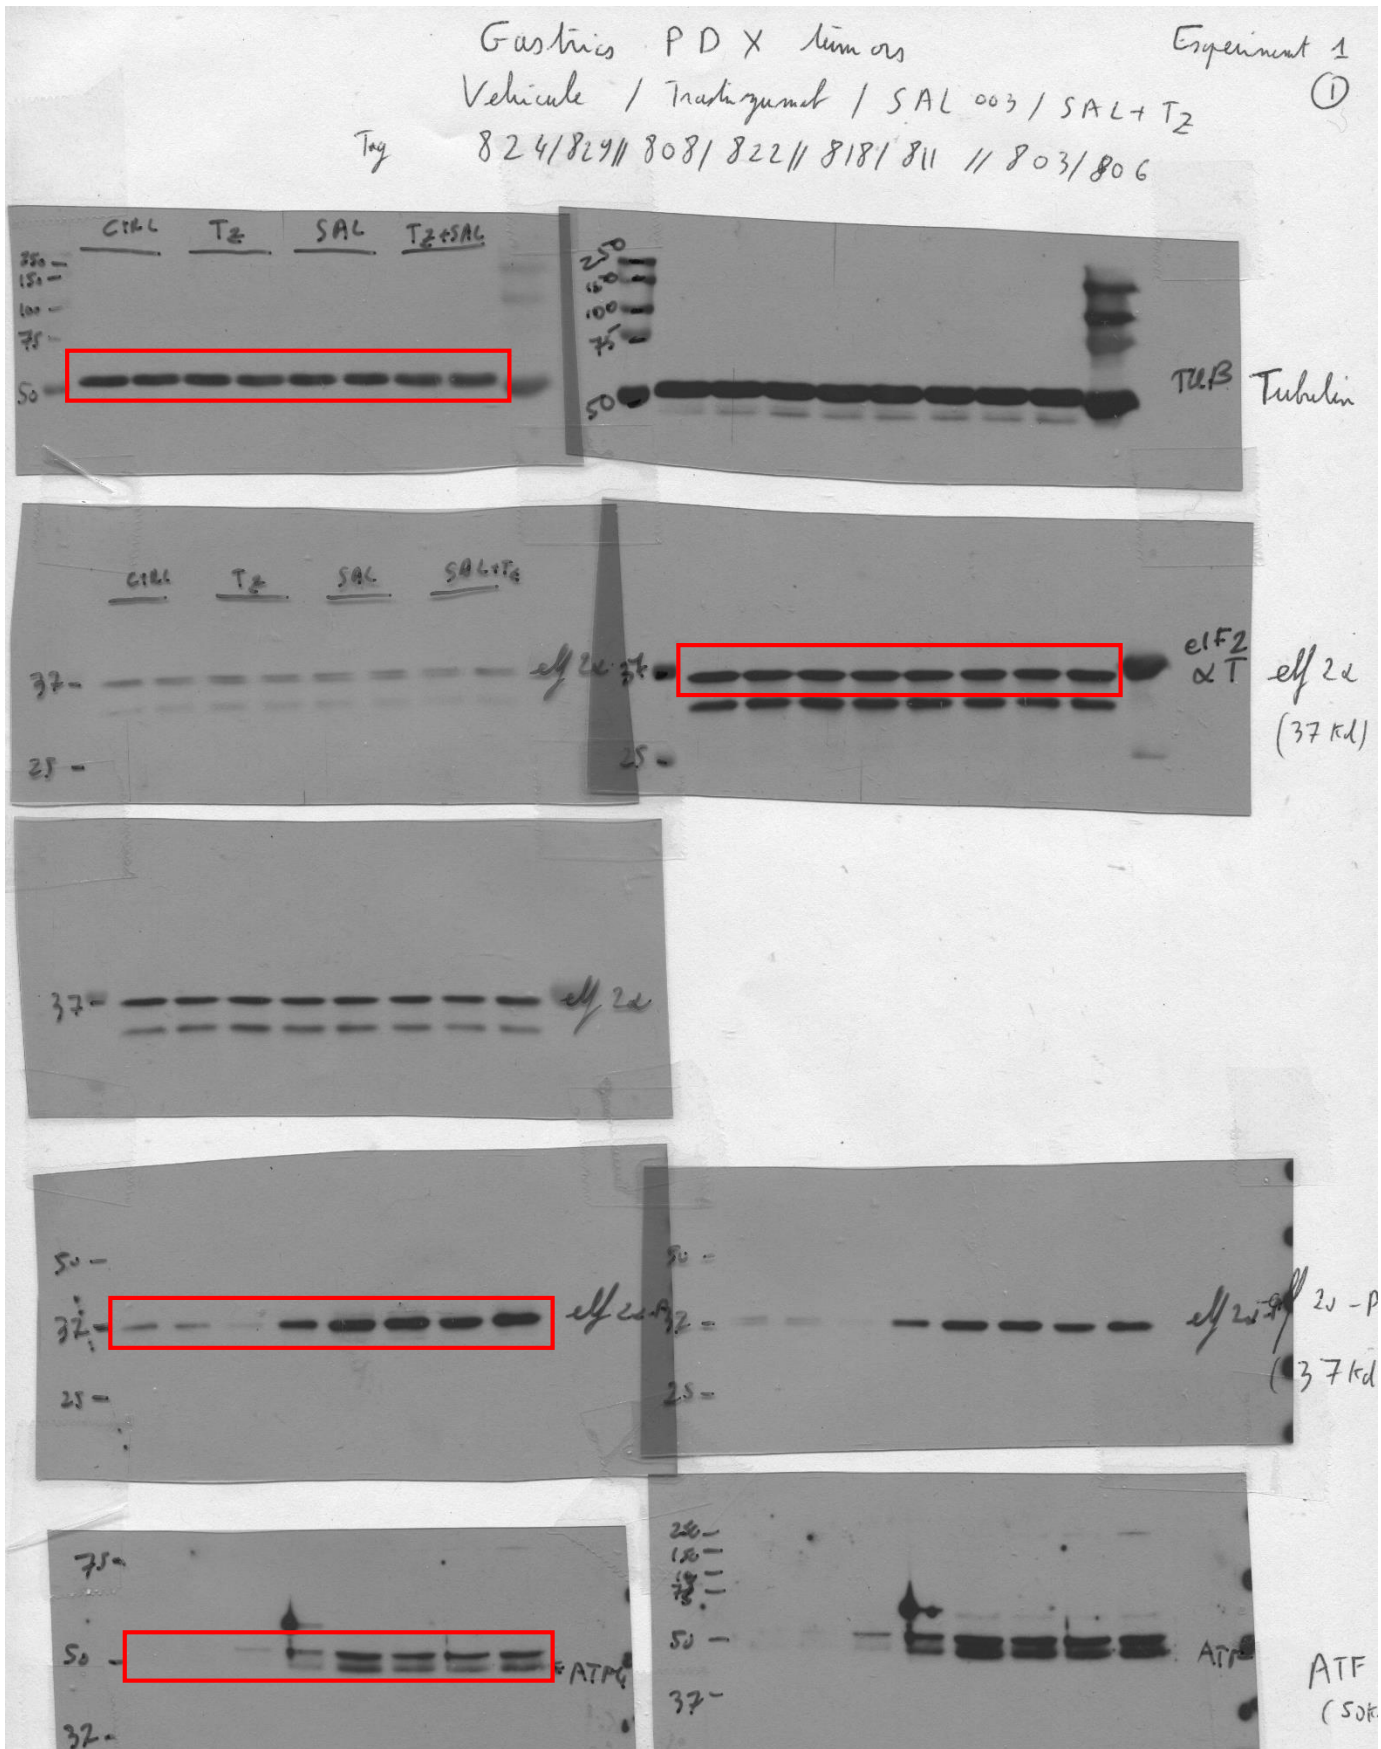

# Blots of Supplementary Figure 7 (cont'd)

Gastric tumor PDXs.  
CTRL / T<sub>Z</sub> / SAL / T<sub>Z</sub> + SAL  
L<sub>7</sub> # 824 / 829 / 808 / 822 / 818 / 811 / 803 / 806

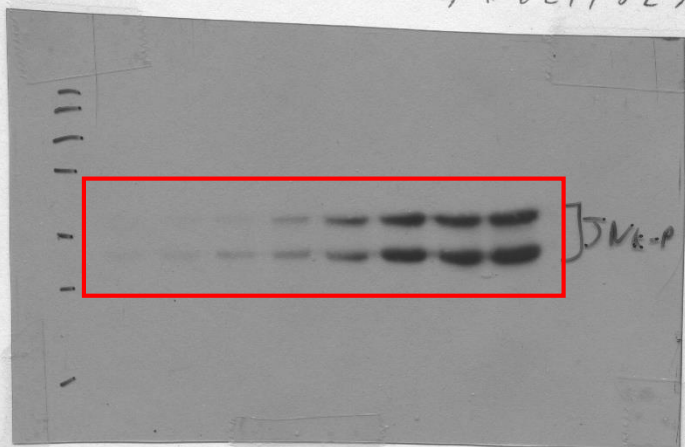

JNK1/2 - P  
(54 - 46 kD)

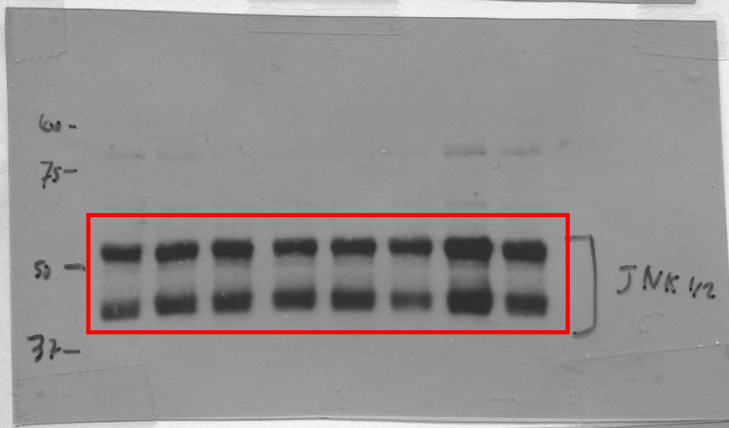

JNK1/2  
(54 - 46 kD)

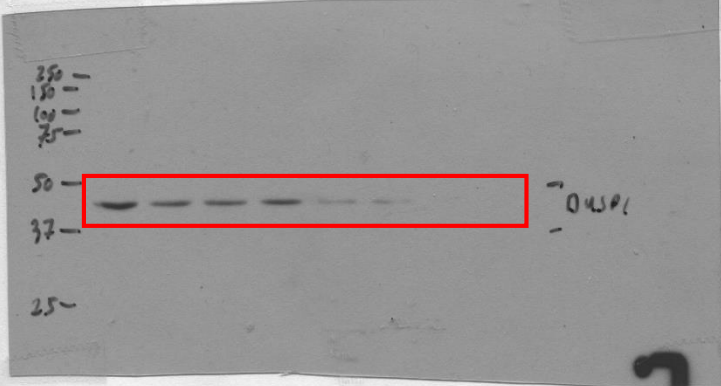

DUSP1 (45 kD)

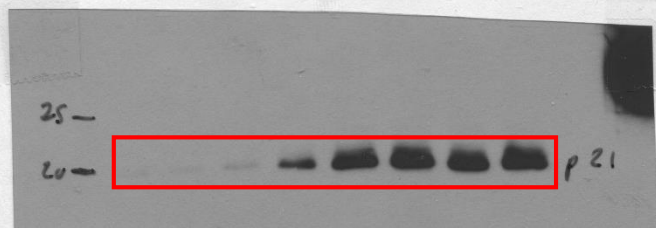

p21 (= 21 kD)
